# Supplementary material for: Application of the Multi-Scale Infrastructure for Chemistry and Aerosols version 0 (MUSICAv0) for air quality in Africa
Source: Copernicus journal article supplement (doi:10.5194/gmd-2023-50), 2023-05-04
Supplement: Supplementary file [file gmd-2023-50-AC1-supplement.pdf]

1 **Application of the Multi-Scale Infrastructure for Chemistry and Aerosols**  
2 **version 0 (MUSICAv0) for air quality in Africa**

3  
4  
5 **Wenfu Tang<sup>1</sup>, Louisa K. Emmons<sup>1</sup>, Helen M. Worden<sup>1</sup>, Rajesh Kumar<sup>2</sup>, Cenlin He<sup>2</sup>,**  
6 **Benjamin Gaubert<sup>1</sup>, Zhonghua Zheng<sup>3</sup>, Simone Tilmes<sup>1</sup>, Rebecca R. Buchholz<sup>1</sup>, Sara-Eva**  
7 **Martinez-Alonso<sup>1</sup>, Claire Granier<sup>4,5</sup>, Antonin Soulie<sup>4</sup>, Kathryn McKain<sup>5,6</sup>, Bruce C. Daube<sup>7</sup>,**  
8 **Jeff Peischl<sup>5,8</sup>, Chelsea Thompson<sup>8</sup>, and Pieternel Levelt<sup>1,9,10</sup>**

9  
10 <sup>1</sup>Atmospheric Chemistry Observations & Modeling Laboratory, National Center for Atmospheric  
11 Research, Boulder, CO, USA

12 <sup>2</sup>Research Applications Laboratory, National Center for Atmospheric Research, Boulder, CO,  
13 USA

14 <sup>3</sup>Department of Earth and Environmental Sciences, The University of Manchester, Manchester  
15 M13 9PL, United Kingdom

16 <sup>4</sup>Laboratoire d'Aérodologie, CNRS, Université de Toulouse, Toulouse, France

17 <sup>5</sup>Cooperative Institute for Research in Environmental Sciences (CIRES), University of Colorado,  
18 Boulder, CO, USA

19 <sup>6</sup>Global Monitoring Laboratory (GML), National Oceanic and Atmospheric Administration,  
20 Boulder, CO, USA

21 <sup>7</sup>Department of Earth and Planetary Sciences, Harvard University, Cambridge, MA, USA

22 <sup>8</sup>NOAA Chemical Sciences Laboratory, Boulder, CO, USA

23 <sup>9</sup>Royal Netherlands Meteorological Institute (KNMI), Utrechtseweg 297, 3730 AE De Bilt, the  
24 Netherlands

25 <sup>10</sup>University of Technology Delft, Mekelweg 5, 2628 CD Delft, the Netherlands

26  
27 Correspondence: Wenfu Tang ([wenfut@ucar.edu](mailto:wenfut@ucar.edu))

28  
29  
30 **Abstract**

31 The Multi-Scale Infrastructure for Chemistry and Aerosols Version 0 (MUSICAv0) is a new  
32 community modeling infrastructure that enables the study of atmospheric composition and  
33 chemistry across all relevant scales. We develop a MUSICAv0 grid with Africa refinement (~28  
34 km × 28 km over Africa). We evaluate the MUSICAv0 simulation for 2017 with in situ  
35 observations and compare the model results to satellite products over Africa. A simulation from  
36 the Weather Research and Forecasting model coupled with Chemistry (WRF-Chem), a regional  
37 model that is widely used in Africa studies, is also included in the analyses as a reference. Overall,  
38 the performance of MUSICAv0 is comparable to WRF-Chem. Both models underestimate carbon  
39 monoxide (CO) compared to in situ observations and satellite CO column retrievals from the  
40 Measurements of Pollution in the Troposphere (MOPITT) satellite instrument. MUSICAv0 tends  
41 to overestimate ozone (O<sub>3</sub>), likely due to overestimated stratosphere-to-troposphere flux of ozone.  
42 Both models significantly underestimate fine particulate matter (PM<sub>2.5</sub>) at two surface sites in East  
43 Africa. The MUSICAv0 simulation agrees better with aerosol optical depth (AOD) retrievals from  
44 the Moderate Resolution Imaging Spectroradiometer (MODIS) and tropospheric nitrogen dioxide

45 (NO<sub>2</sub>) column retrievals from the Ozone Monitoring Instrument (OMI) than WRF-Chem.  
46 MUSICA<sub>v0</sub> has a consistently lower tropospheric formaldehyde (HCHO) column than OMI  
47 retrievals. Based on model-satellite discrepancies between MUSICA<sub>v0</sub> and WRF-Chem and  
48 MOPITT CO, MODIS AOD, and OMI tropospheric NO<sub>2</sub>, we find that future field campaign(s)  
49 and more in situ observations in an East African region (30°E – 45°E, 5°S – 5°N) could  
50 substantially improve the predictive skill of atmospheric chemistry model(s). This suggested focus  
51 region exhibits the largest model-in situ observation discrepancies, as well as targets for high  
52 population density, land cover variability, and anthropogenic pollution sources.

53

## 54 **1. Introduction**

55 As one of the most dramatically changing continents, Africa is experiencing myriad  
56 environmental sustainability issues (e.g., Washington et al., 2006; Ziervogel et al., 2014; Boone et  
57 al., 2016; Baudoin et al., 2017; Güneralp et al., 2017; Nicholson 2019; Fisher et al., 2021; Kumar  
58 et al., 2022). These environmental issues are causing vast losses in lives and in African economies,  
59 and are coupled with poverty and under-development (Washington et al., 2006; Fisher et al., 2021).  
60 Some of these environmental challenges are particularly severe in Africa compared to many other  
61 regions of the world (e.g., famine, droughts, floods, high temperatures, land degradation, and fires;  
62 Washington et al., 2006; van der Werf et al., 2017). However, even though Africa is the second  
63 largest continent, in land area and population, attention and research on environmental challenges  
64 in Africa are very limited, leading to a deficit of knowledge and solutions (e.g., De Longueville et  
65 al., 2010). Degraded air quality is an example of a severe environmental challenge with growing  
66 importance in Africa (e.g., Lioussé et al., 2014; Thompson et al., 2014; Heft-Neal et al., 2018;  
67 Fisher et al., 2021; Vohra et al., 2022). A previous study found that air pollution across Africa  
68 caused ~1.1 million deaths in 2019 (Fisher et al., 2021). However, the study of air quality in Africa  
69 is hindered by the scarcity of ground-based observations (e.g., Paton-Walsh et al., 2022),  
70 modelling capability and the use of satellite observations. In this paper, we will focus on air quality  
71 analyses over Africa with the new model Multi-Scale Infrastructure for Chemistry and Aerosols  
72 (MUSICA; Pfister et al., 2020).

73 Atmospheric chemistry modeling is a useful tool to perform research on air quality  
74 conditions and evolution. Various models have been applied to study atmospheric chemistry and  
75 air quality in Africa such as the Weather Research and Forecasting (WRF) model coupled with  
76 Chemistry (WRF-Chem) (e.g., Kuik et al., 2015; Kumar et al., 2022), the GEOS-Chem chemical  
77 transport model (e.g., Marais et al., 2012, 2019; Lacey et al., 2018), the CHIMERE chemical  
78 transport model (e.g., Menut et al., 2018; Mazzeo et al., 2022), and the U.K. Earth System Model  
79 (UKESM1) (Brown et al., 2022), and GEOS5 (Bauer et al., 2019).

80 MUSICA is a new state-of-the-art community modeling infrastructure that enables the  
81 study of atmospheric composition and chemistry across all relevant scales (Pfister et al., 2020).  
82 The newly developed MUSICA Version 0 (MUSICA<sub>v0</sub>) is a global chemistry-climate model that  
83 allows global simulations with regional refinement down to a few kilometers spatial resolution  
84 (Schwantes et al., 2022). The coupling with other components of the Earth system (e.g., land,  
85 ocean, and sea ice) can also be performed at multiple scales. MUSICA<sub>v0</sub> has various advantages  
86 and is particularly suitable for research applications over Africa. For example, MUSICA<sub>v0</sub> can be  
87 used to study the interactions between atmospheric chemistry and other components of the Earth  
88 system and climate. MUSICA also includes the whole atmosphere (from the surface to  
89 thermosphere), and therefore can also be used to study the stratosphere and above and interactions  
90 between the stratosphere and troposphere. This is critical because some of the environmental issues

91 in Africa are coupled (e.g., the ozone–climate penalty; Brown et al., 2022). In addition, as a global  
92 model, MUSICAv0 does not require boundary conditions to study a region at high resolution.  
93 Global impacts and interactions can be simulated in a consistent and coherent way. This feature is  
94 important as inflow from other continents and oceans significantly impacts air quality in Africa.  
95 MUSICAv0 has been evaluated over North America (Schwantes et al., 2022, Tang et al., 2022)  
96 and is also being developed and tested in other regions around the globe  
97 (<https://wiki.ucar.edu/display/MUSICA/Available+Grids>).

98 This paper serves as the basis for the future application of MUSICAv0 in Africa. In this  
99 study, we develop a MUSICAv0 model grid with regional refinement over Africa. Because  
100 MUSICAv0 with Africa refinement is newly developed while WRF-Chem has been previously  
101 used for African atmospheric chemistry and air quality studies, here we include results from WRF-  
102 Chem to assess the ability of MUSICAv0 in reproducing the regional features of atmospheric  
103 composition as simulated by WRF-Chem. We conduct the MUSICAv0 simulation for the year  
104 2017 to compare with a previous WRF-Chem simulation (Kumar et al., 2022). MUSICAv0 and  
105 the WRF-Chem simulation and the observational data used in this study are described in Section  
106 2. The MUSICAv0 model simulation results are evaluated against in situ observations and  
107 compared with satellite retrievals in Section 3. In Section 4, we provide an example application of  
108 MUSICAv0 over Africa – identifying key potential regions in Africa for future in situ observations  
109 and field campaign(s).  
110

## 111 2. Model and data

### 112 2.1 MUSICAv0

113 MUSICAv0 is a newly developed framework for simulations of large-scale atmospheric  
114 phenomena in a global modeling framework, while still resolving chemistry at emission- and  
115 exposure-relevant scales (Pfister et al., 2020). MUSICAv0 is a configuration  
116 of the Community Earth System Model (CESM). It is also known as the Community Atmospheric  
117 Model with chemistry (CAM-chem) (Tilmes et al., 2019; Emmons et al., 2020) with regional  
118 refinement (RR) down to a few kilometers (Lauritzen et al., 2018; Schwantes et al., 2022). CAM-  
119 chem, and thus MUSICAv0, includes several choices of chemical mechanisms of varying  
120 complexity. This study uses the default MOZART-TS1 chemical mechanism for gas phase  
121 chemistry (including comprehensive tropospheric and stratospheric chemistry; Emmons et al.,  
122 2020) and the four-mode version of the Modal Aerosol Module (MAM4; Liu et al., 2016) for the  
123 aerosol scheme. The MUSICAv0 model source code and the model documentation can be  
124 downloaded through <https://wiki.ucar.edu/display/MUSICA/MUSICA+Home> (last access: 3  
125 April 2023).

126 The MUSICAv0 users have the option to create their own model grid. MUSICAv0 is  
127 currently being developed and tested for applications over various regions globally  
128 (<https://wiki.ucar.edu/display/MUSICA/Available+Grids>), including North America, India, East  
129 Asia, South America, Australia, and Korea, among others. (e.g., Schwantes et al., 2022; Tang et  
130 al., 2022; Jo et al., 2023). In this study, we develop a model grid for applications in Africa  
131 (ne0np4.africa\_v5.ne30x4). As shown in Figure 1a, the horizontal resolution is  $\sim 111 \text{ km} \times 111 \text{ km}$   
132 (i.e.,  $1^\circ$  latitude  $\times$   $1^\circ$  equatorial longitude) globally, and  $\sim 28 \text{ km} \times 28 \text{ km}$  (i.e.,  $0.25^\circ$  latitude  $\times$   
133  $0.25^\circ$  equatorial longitude) within the region over Africa. Our simulation uses the default option  
134 for vertical layers (i.e., 32 layers from the surface to  $\sim 3.64 \text{ hPa}$ ).

Moved (insertion) [1]

135 Here we run MUSICAv0 with the model grid for Africa for the year 2017, saving 3-hourly  
136 output. We use the Copernicus Atmosphere Monitoring Service Global Anthropogenic emissions,  
137 (CAM5-GLOB-ANTH) version 5.1 (Soulie et al., 2023) for anthropogenic emissions and the  
138 Quick Fire Emissions Dataset (QFED) for fire emissions (Darmanov and da Silva, 2013). CAMS-  
139 GLOB-ANTH version 5.1 emissions can be found at <https://eccad3.sedoo.fr/data> (last access: 3  
140 April 2023). QFED emissions can be found at  
141 <https://portal.nccs.nasa.gov/datashare/icsa/aerosol/emissions/QFED/> (last access: 3 April 2023).  
142 Plume rise climatology is applied to fire emissions following Tang et al. (2022). In addition, we  
143 also include open waste burning (<https://www.acom.ucar.edu/Data/fire/>; Wiedinmyer et al., 2014)  
144 emissions in the simulation. The model has the option of a free-running atmosphere or nudging to  
145 external meteorological reanalysis. In this simulation, only wind and temperature are nudged to  
146 the Modern-Era Retrospective analysis for Research and Applications, Version 2 (MERRA-2;  
147 Gelaro et al., 2017) with a relaxation time of 12 hours. MERRA-2 data can be found at  
148 <https://disc.gsfc.nasa.gov/datasets/project=MERRA-2> (last access: 3 April 2023).

149 We also added carbon monoxide (CO) tracers in the simulation to understand the source  
150 and transport of air pollution. CO tracers in CAM-chem/MUSICAv0 are described in detail by  
151 Tang et al. (2019). In this study we include tracers for 6 regions (North Africa, West Africa, East  
152 Africa, Central Africa, Southern Africa, and the rest of the world) and 3 emission sources  
153 separately (anthropogenic emissions, fire emissions, and open waste burning emissions). In total,  
154 there are 18 tagged CO tracers.

## 156 2.2 WRF-Chem

157 The Weather Research and Forecasting (WRF) model coupled with Chemistry (WRF-  
158 Chem) is a regional chemical transport model. It has been widely used for air quality studies in  
159 Africa. In this study we use model results from a WRF-Chem simulation described by Kumar et  
160 al. (2022). The WRF-Chem simulation has a grid spacing of 20 km, slightly higher than the  
161 MUSICAv0 simulation, and the model domain is highlighted in Figure 1a. The simulation has 36  
162 vertical levels from the surface to ~50 hPa. The WRF-Chem simulation uses the Model for Ozone  
163 and Related Tracers-4 (MOZART-4) chemical mechanism (Emmons et al., 2010) for tropospheric  
164 gas phase chemistry, and the Goddard Global Ozone Chemistry Aerosol Radiation and Transport  
165 (GOCART) model (Chin et al., 2002) for aerosol processes. The European Centre for Medium  
166 Range Weather Forecasts (ECMWF) global reanalysis (ERA-Interim) fields are used for initial  
167 and boundary meteorology conditions, while another CAM-chem simulation is used for initial and  
168 boundary chemical conditions (Kumar et al., 2022). The WRF-Chem simulation used the global  
169 Emission Database for Atmospheric Research developed for Hemispheric Transport of Air  
170 Pollution (EDGAR-HTAP v2) for anthropogenic emissions and the Fire Inventory from NCAR  
171 version 1.5 (FINNv1.5) (Wiedinmyer et al., 2011) for fire emissions. The WRF-Chem output is  
172 saved hourly, however we only use 3-hourly output to match the MUSICAv0 simulation.

## 174 2.3 ATom

175 The Atmospheric Tomography mission (ATom; Thompson et al. 2022) was designed to  
176 study the impact of human-produced air pollution on greenhouse gases, chemically reactive gases,  
177 and aerosols in remote ocean air masses. ATom data are available at  
178 <https://espoarchive.nasa.gov/archive/browse/atom> (last access: 3 April 2023). During the project,  
179 the DC-8 aircraft sampled the remote troposphere with continuous vertical profiles. There were  
180 four seasonal deployments from the summer of 2016 through the spring of 2018. Here we compare

Moved (insertion) [2]

181 the MUSICAv0 simulation with observations from ATom-2 (January–February 2017) and ATom-  
182 3 (September–October 2017). Since the ATom flight tracks were mostly outside the WRF-Chem  
183 domain (Figure 1a), we do not compare the WRF-Chem simulation with ATom data. However,  
184 we compare chemical species from the MUSICAv0 simulation to the 2-minute merged ATom  
185 measurements globally to obtain a benchmark and broader understanding of MUSICAv0  
186 performance both within and outside the refined region. The model output is saved along the ATom  
187 aircraft flight tracks and with respect to the observational times at run time. Nitric oxide (NO) and  
188 ozone (O<sub>3</sub>) measurements from the NOAA Nitrogen Oxides and Ozone (NOyO3) instrument  
189 (Bourgeois et al., 2020, 2021) and the merged CO data (from Quantum Cascade Laser System and  
190 NOAA Picarro CO measurements) are used.

#### 191 192 **2.4 IAGOS**

193 The In-service Aircraft for a Global Observing System (IAGOS) is a European research  
194 infrastructure, and was developed for operations on commercial aircraft to monitor atmospheric  
195 composition (Petzold et al., 2015). [IAGOS data are available at https://www.iagos.org/iagos-data/](https://www.iagos.org/iagos-data/)  
196 [\(last access: 3 April 2023\)](https://www.iagos.org/iagos-data/). The IAGOS instrument package 1 measures CO, O<sub>3</sub>, air temperature,  
197 and water vapor (<https://www.iagos.org/iagos-core-instruments/package1/>). CO is measured by  
198 infrared absorption using the gas filter correlation technique (Precision: ±5%, Accuracy: ±5 ppb)  
199 while O<sub>3</sub> is measured by UV absorption at 253.7 nm (Precision: ±2%, Accuracy: ±2 ppb). We use  
200 airborne measurements of CO, O<sub>3</sub>, air temperature, and water vapor from IAGOS for model  
201 evaluation. The locations of the IAGOS flight tracks over Africa are shown in Figure 1b. The  
202 model results and IAGOS data comparisons are conducted separately for five African sub-regions  
203 (defined in Figure 1b).

#### 204 205 **2.5 Ozonesondes**

206 The ozonesonde is a balloon-borne instrument that measures atmospheric O<sub>3</sub> profiles  
207 through the electrochemical concentration cell using iodine/iodide electrode reactions (Thompson  
208 et al., 2017), with records of temperature, pressure, and relative humidity from standard  
209 radiosondes. [NASA/GSFC SHADOZ data are available at https://tropo.gsfc.nasa.gov/shadoz/](https://tropo.gsfc.nasa.gov/shadoz/) [\(last](https://tropo.gsfc.nasa.gov/shadoz/)  
210 [access: 3 April 2023\)](https://tropo.gsfc.nasa.gov/shadoz/). We use ozonesonde data from Southern Hemisphere ADditional  
211 OZonesondes (NASA/GSFC SHADOZ; Thompson et al., 2017; Witte et al., 2017, 2018).  
212 Specifically, ozonesonde data from four sites are used (Figure 1b): Ascension (Ascension Island,  
213 U.K.), Nairobi (Kenya), Irene (South Africa), and La Reunion (La Réunion Island, France). The  
214 average O<sub>3</sub> measurement uncertainty ranged from 5–9% for the ozonesonde data used in this study.

#### 215 216 **2.6 WDCGG**

217 Monthly surface CO measurements from the World Data Center for Greenhouse Gases  
218 (WDCGG; operated by the Japan Meteorological Agency in collaboration with the World  
219 Meteorological Organization) are used for model evaluation. [WDCGG data are available at](https://gaw.kishou.go.jp/)  
220 <https://gaw.kishou.go.jp/> [\(last access: 3 April 2023\)](https://gaw.kishou.go.jp/). Data from six sites are used (Figure 1b),  
221 namely (Ascension Island, U.K.), Assekrem (Algeria; remote site located in Saharan desert),  
222 Gobabeb (Namibia; located at the base of a linear sand dune, next to an interdune plain), Cape  
223 Point (South Africa; site exposed to the sea on top of a cliff 230 meters above sea level), Izana  
224 (Tenerife, Spain; located on the Island that is ~300 km west of the African coast), and Mare  
225 (Seychelles; near an international airport).

226

227 **2.7 Surface PM<sub>2.5</sub>**

228 At the U.S. embassies, regulatory-grade monitoring data are collected with Beta  
229 Attenuation Monitors (BAMs), using a federal equivalent monitoring method, with an accuracy  
230 within 10% of federal reference methods (Watson et al., 1998; U.S. EPA, 2016). These instruments  
231 are operated by the U.S. State Department and the U.S. EPA, and data are available through  
232 AirNow (<https://www.airnow.gov/international/us-embassies-and-consulates/>). We use the  
233 measurements at the U.S. embassy locations in Addis Ababa Central (Ethiopia, 9.06° N, 38.76° E)  
234 and Kampala (Uganda, 0.30° N, 32.59° E) for the year 2017 as references (Malings et al., 2020)  
235 to match our simulations. The raw data are made available hourly and for this study we use daily  
236 mean PM<sub>2.5</sub> for comparison with model simulations.

237  
238 **2.8 MOPITT**

239 The Measurements of Pollution in the Troposphere (MOPITT) instrument on board the  
240 NASA Terra satellite provides both thermal-infrared (TIR) and near-infrared (NIR) radiance  
241 measurements since March 2000. [MOPITT CO data can be accessed through](https://search.earthdata.nasa.gov/search)  
242 <https://search.earthdata.nasa.gov/search> (last access: 3 April 2023). Retrievals of CO column  
243 density and vertical profiles are provided in a multispectral TIR–NIR joint product which has  
244 sensitivity to near-surface as well as free tropospheric CO (Deeter et al., 2011; Worden et al.,  
245 2010). Here we use the MOPITT Version 9 Level 2 CO column product (Deeter et al., 2022) over  
246 Africa to evaluate the MUSICAv0 and WRF-Chem simulations. MOPITT Version 9 has  
247 significant updates to the cloud detection algorithm and NIR calibration scheme. The MOPITT  
248 satellite pixel size is ~22 km × 22 km, and the overpass time is ~10:30 am local time in 2017.  
249 When comparing model outputs to MOPITT the recommended data quality filter is applied and  
250 model outputs are interpolated to the MOPITT retrievals in space and time. To perform  
251 quantitative comparisons, the MOPITT averaging kernel and a priori are used to transform the  
252 model CO profiles to derive model column amounts.

253  
254 **2.9 OMI NO<sub>2</sub> (QA4ECV)**

255 Tropospheric column NO<sub>2</sub> from the Ozone Monitoring Instrument (OMI) on board Aura  
256 is compared to the model in this study. Specifically, the NO<sub>2</sub> product from the quality assurance  
257 for the essential climate variables (QA4ECV) project is used (Boersma et al., 2017a; Compernelle  
258 et al., 2020). [OMI NO<sub>2</sub> data are available at https://www.temis.nl/qa4ecv/no2.html](https://www.temis.nl/qa4ecv/no2.html) (last access: 3  
259 April 2023). The satellite pixel size is ~13 km × 25 km, and the overpass time is ~1:40 pm local  
260 time in 2017. A data quality filter was applied following the Product Specification Document  
261 (Boersma et al., 2017b; processing\_error\_flag = 0, solar\_zenith\_angle < 80, snow\_ice\_flag < 10  
262 or snow\_ice\_flag = 255, amf\_trop/amf\_geo > 0.2, and cloud\_radiance\_fraction\_no20 <= 0.5).  
263 Model profiles were transformed using the provided tropospheric air mass factor (AMF) and  
264 averaging kernels.

265  
266 **2.10 OMI HCHO (QA4ECV)**

267 We also use tropospheric column HCHO from OMI in this study. Similar to OMI NO<sub>2</sub>, we  
268 also use OMI HCHO product from QA4ECV (De Smedt et al., 2017a). [OMI HCHO data are](https://www.temis.nl/qa4ecv/hcho.html)  
269 [available at https://www.temis.nl/qa4ecv/hcho.html](https://www.temis.nl/qa4ecv/hcho.html) (last access: 3 April 2023). A data quality  
270 filter was applied following the Product User Guide (De Smedt et al., 2017b; processing\_error\_flag  
271 = 0 and processing\_quality\_flag = 0). Model profiles were transformed using provided averaging  
272 kernels. We note that HCHO retrievals are subject to relatively large uncertainties compared to

Deleted: MERRA-2 data can be found at <https://disc.gsfc.nasa.gov/datasets?project=MERRA-2> (last access: 3 April 2023). ATom data are available at <https://espoarchive.nasa.gov/archive/browse/atom> (last access: 3 April 2023). WDCGG data are avail

Formatted

278 other satellite products used in this study. Therefore, the comparisons between model results and  
279 the OMI HCHO product only indicate the model-satellite discrepancies rather than determining  
280 model deficiencies. In addition, the WRF-Chem simulation from Kumar et al. (2022) does not  
281 include HCHO in the output and hence will not be compared. ▲

Formatted

## 282 283 **2.11 MODIS AOD**

284 The aerosol optical depth (AOD) product (550 nm) from the Moderate Resolution Imaging  
285 Spectroradiometer (MODIS) on board Terra NASA Terra satellite is used. [MODIS AOD data can](https://search.earthdata.nasa.gov/search)  
286 [be accessed through https://search.earthdata.nasa.gov/search](https://search.earthdata.nasa.gov/search) (last access: 3 April 2023).  
287 Specifically, we used the MODIS Level 2 Collection 6.1 product (MOD04\_L2; Levy et al., 2017).  
288 Deep Blue Aerosol retrievals are used (Hsu et al., 2013; Levy et al., 2013) to include retrievals  
289 over the desert. The MODIS satellite pixel size is  $\sim 1 \text{ km} \times 1 \text{ km}$ , and the overpass time is  $\sim 10:30$   
290 am local time.  
291

## 292 **3. Model comparisons with satellite data and evaluation with in situ observations**

293 Africa includes a wide range of environments and emissions source. Therefore, in this  
294 section we separate the continent in five sub-regions for analysis following Kumar et al. (2022).  
295 CO is a good tracer of anthropogenic and biomass burning emissions and modeled CO tracers are  
296 used in this section to understand sources. Figure 2 shows the seasonal averages of CO column  
297 distributions over Africa from MOPITT along with the MUSICAv0 and WRF-Chem biases. The  
298 highest levels of CO in these maps are primarily associated with biomass burning, which moves  
299 around the continent with season. Both MUSICAv0 and WRF-Chem simulations underestimate  
300 the CO column compared to MOPITT (Figures 3a and 3b). Overall, MUSICAv0 agrees better with  
301 the OMI tropospheric NO<sub>2</sub> column (Figure 3c) and MODIS AOD (Figure 3e) than WRF-Chem  
302 (Figures 3d and 3f). The MUSICAv0 simulation overall has lower tropospheric HCHO column  
303 than OMI in all regions and seasons (Figure 3g). Spatial distributions of model biases against the  
304 OMI tropospheric NO<sub>2</sub> column, MODIS AOD, and OMI tropospheric HCHO column are included  
305 in Figures S1–S3. In this section we compare the model results with satellite data and in situ  
306 observations over sub-regions in Africa and oceans near Africa (Figure 1b).  
307

### 308 **3.1 North Africa**

309 Over North Africa, both MUSICAv0 and WRF-Chem simulations underestimate the CO  
310 column during 2017 (Figures 2 and 3). As shown by the tagged model CO tracers (Figure 4), CO  
311 over North Africa is mainly driven by transport of CO from outside the continent and  
312 anthropogenic emissions. The model underestimation compared to the MOPITT CO column is  
313 consistent with the results of the comparisons with surface CO observations from WDCGG at the  
314 two sites located in North Africa (Assekrem and Izana; Figures 5a and 5c). At the two surface  
315 sites, the composition of source types and source regions are close to the composition of source  
316 types and source regions of the column average over North Africa (Figure 4 and Figures S4 and  
317 S5), hence the two sites are representative of the background conditions of North Africa.  
318 Compared to MODIS AOD, WRF-Chem has a mean bias of 0.36 whereas MUSICAv0's mean  
319 bias is 0.17 for 2017. The model AOD biases over North Africa are likely driven by dust. No  
320 comparison is made with IAGOS O<sub>3</sub> in North Africa due to data availability.  
321

### 322 **3.2 West Africa**

323 Over West Africa, fire and anthropogenic emissions are both important for CO pollutant  
324 and fire impacts peak in DJF (December, January, and February). Compared to the MOPITT CO  
325 column, the mean bias of MUSICAv0 and WRF-Chem for West Africa peak around February –  
326 the dry season of the Northern Hemisphere (Figure 3). In February, the MUSICAv0 mean bias is  
327  $-1.1 \times 10^{18}$  molecules/cm<sup>2</sup> and WRF-Chem mean bias is  $-7.5 \times 10^{17}$  molecules/cm<sup>2</sup>, which are likely  
328 driven by fire emission sources (Figure 4). Model comparisons with IAGOS CO also show a  
329 similar bias – both model simulations underestimate CO at all vertical levels. The underestimation  
330 peaks during DJF and below 600 hPa (Figure 6). As for MODIS AOD, WRF-Chem has the mean  
331 bias 0.69 whereas MUSICAv0's mean bias is 0.15, respectively. Similar to North Africa, the model  
332 biases in AOD over West Africa are also likely driven by dust and biomass burning. We also  
333 compare modeled O<sub>3</sub> with IAGOS O<sub>3</sub> observations (Figure 7).

334 Over West Africa, both models agree well with the IAGOS O<sub>3</sub> observations below 800 hPa  
335 (mean bias ranges from -1 to -4 ppb). Above 800 hPa over West Africa, WRF-Chem  
336 underestimates O<sub>3</sub> while MUSICAv0 overestimates O<sub>3</sub>. Overall, MUSICAv0 consistently  
337 overestimates O<sub>3</sub> above 800 hPa in all seasons while the direction of WRF-Chem bias changes  
338 with seasons (Figure 7). When MUSICAv0 overestimates O<sub>3</sub>, the bias is in general larger at the  
339 higher altitude of the troposphere. The concentration of the model stratospheric ozone tracer, O3S,  
340 is also larger at the higher altitude in DJF (Figure 9). The correlation of modeled O<sub>3</sub> and O3S is  
341 0.54, and the correlations of O<sub>3</sub>S and model O<sub>3</sub> bias (modeled O<sub>3</sub> minus IAGOS O<sub>3</sub>) is 0.35 over  
342 West Africa, implying the overestimation of O<sub>3</sub> in the upper troposphere could be partially driven  
343 by too strong stratosphere-to-troposphere flux of ozone. Lightning NO emissions can also impact  
344 O<sub>3</sub> in the upper troposphere. The MUSICAv0 simulation has somewhat (~3 times) higher lightning  
345 NO emissions (Figure S6) compared to a standard CAM-chem simulation (not shown), therefore  
346 the high ozone in the upper troposphere may be due to an over-estimate of lightning NO. Impacts  
347 of lightning NO emissions on upper troposphere O<sub>3</sub> in MUSICAv0 will be investigated and  
348 evaluated further in the future. A brief comparison with IAGOS measurements of air temperature  
349 and water vapor profiles over West Africa as well as other sub-regions shows that MUSICAv0  
350 overall agrees well with these meteorological variables (Figure S7).

### 351 352 **3.3 Central Africa**

353 Compared to MOPITT CO column, the mean bias of MUSICAv0 and WRF-Chem for  
354 Central Africa varies with seasons (Figure 3) but peaks during the dry season in September  
355 (MUSICAv0 mean bias of  $-1.0 \times 10^{18}$  molecules/cm<sup>2</sup>; WRF-Chem mean bias of  $-1.2 \times 10^{18}$   
356 molecules/cm<sup>2</sup>). The tagged model CO tracers show that in September, local fire emissions are the  
357 dominant driver of CO in Central Africa (Figure 4). Compared to the IAGOS CO profiles (Figure  
358 6), both models have the largest bias over Central Africa among the sub-regions in Africa – mean  
359 bias of MUSICAv0 and WRF-Chem are -46 ppb and -36 ppb, respectively. The high bias over  
360 Central Africa mainly occurs during the fire season. In central Africa, both models also  
361 underestimate NO<sub>2</sub> (mean biases of MUSICAv0 and WRF-Chem are  $-1.5 \times 10^{14}$  and  $-5.5 \times 10^{14}$   
362 molecules/cm<sup>2</sup>, respectively). The underestimations in both CO and NO<sub>2</sub> by the two model  
363 simulations are likely driven by the underestimation in fire emissions. Indeed, the emission  
364 estimates from the newest version of FINN (FINNv2.5; Wiedinmyer et al., 2023) are higher  
365 compared to both QFED (used in the MUSICAv0 simulation) and FINNv1.5 (used in the WRF-  
366 Chem simulation) in this region.

367 Model mean bias of HCHO ( $-1.3 \times 10^{16}$  molecules/cm<sup>2</sup> for the whole 2017) over Central  
368 Africa is the largest among the five regions (Figure 3). The spatial distribution of HCHO bias



369 (Figure S4) largely co-locates with the vegetation (Figure 8). Over the barren or sparsely vegetated  
370 area in North Africa and along the west coast of Southern Africa, HCHO biases are relatively small  
371 while over the vegetated area HCHO bias are relatively large. Over North Africa, the mean bias is  
372  $-0.66 \times 10^{16}$  molecules/cm<sup>2</sup> for the whole 2017 whereas over the other four regions, the mean bias  
373 ranges from  $-0.93 \times 10^{16}$  molecules/cm<sup>2</sup> to  $-1.31 \times 10^{16}$  molecules/cm<sup>2</sup> for the whole 2017. This  
374 indicates that the negative bias in MUSICAv0 HCHO could be due to underestimated biogenic  
375 emissions in the model. In addition, the underestimation of HCHO in Central Africa (Figure S4)  
376 co-locates with the underestimation of CO during fire season (Figure S1), implying that fire  
377 emissions may also contribute to the HCHO underestimation in MUSICAv0. It is important to  
378 note that the uncertainty of OMI tropospheric HCHO column is relatively large compared to other  
379 satellite products. Here the averaged retrieval uncertainty (random and systematic) is ~120%.

380 When compared to the IAGOS O<sub>3</sub> profiles over Central Africa (Figure 7), both models  
381 agree well with the IAGOS O<sub>3</sub> observations below 800 hPa (mean bias ranges from -1 to -4 ppb).  
382 Above 800 hPa, WRF-Chem underestimates O<sub>3</sub> while MUSICAv0 overestimates O<sub>3</sub>. The  
383 correlation of modeled O<sub>3</sub> and O<sub>3</sub>S is 0.67, and the correlations of O<sub>3</sub>S and model O<sub>3</sub> bias is 0.50  
384 over Central Africa, indicating O<sub>3</sub> overestimation in Central Africa are more likely to be impacted  
385 by stratosphere-to-troposphere flux of ozone than that in West Africa.

### 387 3.4 East Africa

388 CO over East Africa is dominated by local emissions and inflow from outside the continent.  
389 Fire and anthropogenic emissions contribute approximately the same to CO over East Africa  
390 (Figure 4). Both MUSICAv0 and WRF-Chem simulations underestimate the CO column  
391 compared to MOPITT (Figure 3), and the WRF-Chem simulation also underestimate the  
392 tropospheric NO<sub>2</sub> column compared to OMI. The biases in CO column and tropospheric NO<sub>2</sub>  
393 column peak in September, likely driven by fire emissions (Figure 4).

394 Compared to IAGOS O<sub>3</sub> profiles over East Africa, biases of MUSICAv0 below 600 hPa  
395 has a seasonal variation while over 600 hPa are consistently positive (Figure 7). The correlations  
396 of O<sub>3</sub>S and model O<sub>3</sub> bias against IAGOS data is 0.50 in the region. The correlations between O<sub>3</sub>S  
397 and model O<sub>3</sub> bias are highest over Central and East Africa compared to other regions, indicating  
398 stratosphere influence are strongest in these two regions among the sub-regions. Central and East  
399 Africa are relatively more mountainous therefore topography driven stratospheric intrusions might  
400 be expected. The Nairobi ozonesonde site is located in East Africa (Figure 1b). When comparing  
401 to the O<sub>3</sub> profiles from ozonesondes (Figure 9), MUSICAv0 overall overestimates O<sub>3</sub> in the  
402 troposphere at the four sites while WRF-Chem tends to underestimate O<sub>3</sub> in the free troposphere  
403 (below 200 hPa). The Nairobi site is an exception where both MUSICAv0 and WRF-Chem  
404 simulations significantly overestimate O<sub>3</sub> in all seasons (mean bias of MUSICAv0 and WRF-  
405 Chem below 200 hPa are 27 ppb and 20 ppb, respectively). Among the four ozonesonde sites,  
406 correlations of model bias of O<sub>3</sub> and O<sub>3</sub>S are highest at the Nairobi site (0.74) where the model  
407 significantly overestimates O<sub>3</sub>. The results of model-ozonesonde comparisons are consistent with  
408 the results of model-IAGOS comparisons and indicate a potential issue in modeled stratosphere-  
409 to-troposphere flux of ozone.

410 There are two surface PM<sub>2.5</sub> sites in East Africa (Addis Ababa and Kampala; Figure 1b).  
411 Despite using different aerosol methods and emission inventories, both MUSICAv0 and WRF-  
412 Chem underestimate surface PM<sub>2.5</sub> when compared to observations at the two sites (Figure 10).  
413 The errors in PM<sub>2.5</sub> concentrations at the U.S. Embassy in Kampala are especially prominent.  
414 However, both models approximate the variation of the PM<sub>2.5</sub> in both locations. Many factors

415 contribute to the inconsistency in the magnitude of modeled PM<sub>2.5</sub> concentrations. For instance,  
416 emission inventories in this region require additional improvement. In Uganda, increasing motor  
417 vehicle ownership and burning biomass for domestic energy use contribute to ambient PM<sub>2.5</sub> levels  
418 (Clarke et al., 2022; Petkova et al., 2013). Detailed PM<sub>2.5</sub> composition measurements would also  
419 help to pinpoint the cause of inaccuracies. In addition, model resolutions could also be a potential  
420 reason for the underestimation.  
421

### 422 3.5 Southern Africa

423 Among the five regions, MUSICAv0 has the lowest mean bias ( $-3.2 \times 10^{17}$  molecules/cm<sup>2</sup>  
424 annually) over Southern Africa (Figure 3). WRF-Chem also has low mean bias and RMSE over  
425 Southern Africa except for the months of September, October, and November (SON) period where  
426 WRF-Chem has larger CO mean bias ( $-6.2 \times 10^{17}$  molecules/cm<sup>2</sup>) than MUSICAv0. Tagged model  
427 CO tracers indicate that CO over Southern Africa is significantly impacted by CO emissions from  
428 Central Africa, East Africa, Southern Africa, and inflow from outside the continent. As for the  
429 source types, anthropogenic and fire emissions are both important and fire impacts peak in  
430 September. There are two WDCGG sites located in Southern Africa (Figure 1b; Gobabeb and Cape  
431 Point). When compared to surface CO observations from WDCGG, both models consistently  
432 underestimate CO by up to 40% at most sites. The Cape Point site in Southern Africa is an  
433 exception (Figure 5) where MUSICAv0 overestimates CO by 40 ppb (annual mean; and up to 78  
434 ppb in May 2017). CO tracers in the model (Figures S4 and S5) show that CO at Cape Point is  
435 mainly driven by anthropogenic CO emissions from Southern Africa. Therefore, the  
436 overestimation of CO by MUSICAv0 should be due to the overestimation of anthropogenic  
437 emissions from Southern Africa used in the model. As for NO<sub>2</sub>, WRF-Chem underestimates  
438 tropospheric NO<sub>2</sub> column in most regions except for Southern Africa (Figure 3). Over Southern  
439 Africa, WRF-Chem overestimates NO<sub>2</sub> especially during June, July, and August (JJA).  
440 MUSICAv0 also tends to overestimates NO<sub>2</sub> at the same location in JJA however the bias is not  
441 as large as for WRF-Chem.

442 MUSICAv0 simulation overall has a lower mean bias (0.14 annually) than the WRF-Chem  
443 simulation (mean bias of 0.31 annually) compared to MODIS AOD with Southern Africa being  
444 the only exception (Figure 3). Over Southern Africa, MUSICAv0 overestimates AOD by ~0.21  
445 annually (Figure 3) and the bias peaks in January (mean bias=0.45). This overestimation in AOD  
446 over Southern Africa is not seen in WRF-Chem. It is likely that the MUSICAv0 overestimation in  
447 AOD over Southern Africa is also due to biases in modeled dust as the AOD bias is co-located  
448 with the only barren or sparsely vegetated area in Southern Africa (Figure 8 and Figure S3).

449 Over Southern Africa, MUSICAv0 tends to overestimate O<sub>3</sub> compared to IAGOS at all  
450 levels at all seasons in 2017 (Figure 7). The concentration of O<sub>3</sub>S over Southern Africa is higher  
451 than those over other regions. However, the correlation of O<sub>3</sub>S and model O<sub>3</sub> bias is lower than  
452 other regions (0.13) indicating stratosphere-to-troposphere flux of ozone may not be the main  
453 driver of O<sub>3</sub> bias over Southern Africa even though stratosphere-to-troposphere flux of ozone are  
454 relatively strong in the region. The Irene ozonesonde site is located in Southern Africa (Figure 1b).  
455 Compared to the ozonesonde O<sub>3</sub> profiles at the Irene site, however, the MUSICAv0 performance  
456 has a seasonal variation (Figure 9e-9h). Compared to other ozonesonde sites, the correlation of  
457 O<sub>3</sub>S and model O<sub>3</sub> bias over Southern Africa is lower (0.14) and MUSICAv0 agrees relatively well  
458 with observations, which is consistent with the comparison results with IAGOS data (Figure 7).  
459

### 460 3.6 Oceans near Africa

461 We compare the CO, NO, and O<sub>3</sub> from the MUSICAv0 simulation with measurements  
462 from ATom-2 and ATom-3 in 2017 (Figure 1a) to provide a global benchmark. Measurements  
463 made over the Atlantic Ocean and Pacific Ocean, and in January-February (Jan-Feb) and  
464 September-October (Sep-Oct) are compared separately (Figures 11 and 12). The comparison was  
465 made with data averaged into 10° latitude and 200 hPa bins. Overall, the model consistently  
466 underestimates CO globally in both seasons. The underestimation of CO is a common issue in  
467 atmospheric chemistry models and could be due to various reasons, including emissions,  
468 deposition, and chemistry (e.g., Fisher et al., 2017; Shindell et al., 2006; Stein et al., 2014; Tilmes  
469 et al., 2015; Tang et al., 2018; Gaubert et al., 2020). Specifically for our MUSICAv0 simulation  
470 in this study, the model bias in CO is relatively large (up to 52 ppb) over the Northern Hemisphere  
471 (especially at high latitude and near the surface) and small over the Southern Hemisphere (Figures  
472 11 and 12). Over the Atlantic Ocean, the bias in CO is larger in September-October than Jan-Feb  
473 in both the Northern Hemisphere (-30 ppb in Jan-Feb versus -34 ppb in Sep-Oct) and Southern  
474 Hemisphere (-11 ppb in Jan-Feb versus -14 ppb in Sep-Oct). Over the Pacific Ocean, however, the  
475 CO bias is similar for both time periods in the Northern Hemisphere (-30 ppb) while in the  
476 Southern Hemisphere, the CO bias changes significantly from -8 ppb in Jan-Feb to -16 ppb in Sep-  
477 Oct. The changes in CO bias over the Southern Hemisphere are likely due to seasonal change in  
478 fire emissions. Overall, the mean biases (Figures 11 and 12) suggest that the simulation agrees  
479 better with ATom observations in the Southern Hemisphere than in the Northern Hemisphere, and  
480 in Jan-Feb than in Sep-Oct (Figures 11 and 12), consistent with Gaubert et al. (2016).

481 In both seasons and both hemispheres, the model in general overestimates O<sub>3</sub> in the  
482 stratosphere/UTLS (upper troposphere and lower stratosphere) by up to 38 ppb (above 200 hPa).  
483 In the troposphere (below 200 hPa), the model overall agrees well with the ATom data over the  
484 Pacific Ocean in the Southern Hemisphere (in most cases the bias is less than ±5 ppb). However,  
485 over the Atlantic Ocean in the Southern Hemisphere, MUSICAv0 tends to overestimate O<sub>3</sub>,  
486 especially in Jan-Feb. In the troposphere of the Northern Hemisphere, MUSICAv0 consistently  
487 overestimates O<sub>3</sub> over both oceans and both seasons. The positive bias in O<sub>3</sub> decreases from the  
488 upper troposphere towards the surface, indicating that the overestimation of O<sub>3</sub> in the troposphere  
489 may be due to stratosphere-to-troposphere flux of ozone. This was also noted for other global  
490 models (Bourgeois et al. 2021). As for NO, the model tends to overestimate NO above 200 hPa  
491 (approximately the stratosphere and Upper Troposphere-Lower Stratosphere; UTLS) by up to 50  
492 ppt. Overall, the NO biases can be either positive or negative depending on location and season.  
493 The distributions of NO bias (Figures 11 and 12) do not show an overall spatial pattern, unlike  
494 those for CO (which changes monotonically with latitude) or O<sub>3</sub> (which changes monotonically  
495 with altitude).  
496

#### 497 **4. Model application: identifying key regions in Africa for future in situ observations and** 498 **field campaign(s)**

499 As a demonstration of the application of MUSICAv0, here we use the results of model-  
500 satellite comparisons to identify potential regions where the atmospheric chemistry models need  
501 to be improved substantially. More field campaigns and more in situ observations would not only  
502 provide observational benchmark dataset to understand and improve the modeling capability in  
503 the region, but would be also useful for the validation and calibration of satellite products. Here  
504 we use Taylor score to quantify model-satellite discrepancies. Taylor score (Taylor, 2001) is  
505 defined by

506

$$S = \frac{4(1+R)}{(\sigma_f+1/\sigma_f)^2(1+R_0)}$$

507 where  $\sigma_f$  is the ratio of  $\sigma_f$  (standard deviation of the model) and  $\sigma_r$  (standard deviation of  
508 observations),  $R$  is correlation between model and observations, and  $R_0$  is the maximum  
509 potentially realizable correlation (=1 in this study). Taylor score ranges from 0 to 1 and a higher  
510 Taylor score indicates better satellite-model agreement. To identify potential locations, we  
511 separate the Africa continent into  $5^\circ \times 5^\circ$  (latitude  $\times$  longitude) pixels as shown in Figure 13. And  
512 for each pixel, we calculate Taylor scores of MUSICA<sub>v0</sub> compared to the three satellite Level 2  
513 products (e.g., MOPITT CO column retrievals, OMI tropospheric NO<sub>2</sub> column retrievals, and  
514 MODIS AOD) separately. And then three Taylor scores are summed up to obtain the total Taylor  
515 score for MUSICA<sub>v0</sub> (ranges from 0 to 3) as shown in Figures 13a-13e. A similar calculation is  
516 conducted for WRF-Chem (Figures 13f-13j). Note that we did not include Taylor scores for HCHO  
517 in the total Taylor score due to that (1) WRF-Chem simulations did not save HCHO output, and  
518 (2) the HCHO retrievals have relatively high uncertainties (Taylor scores of MUSICA<sub>v0</sub> compared  
519 to OMI tropospheric HCHO column retrievals are provided separately in Figure S8).

520 Overall, both MUSICA<sub>v0</sub> and WRF-Chem have low total Taylor scores in the  $30^\circ\text{E} - 45^\circ\text{E}$ ,  
521  $5^\circ\text{S} - 5^\circ\text{N}$  region in East Africa (a region of  $15^\circ$  longitude  $\times$   $10^\circ$  latitude) during MAM (March,  
522 April, and May), JJA (June, July, and August), and SON (September, October, and November), as  
523 highlighted in Figure 13, indicating relatively large model-satellite discrepancies in the region.  
524 Moreover, this is also the region where the Nairobi ozonesonde site and the Kampala surface PM<sub>2.5</sub>  
525 site are located (Figure 1b). As discussed above, both MUSICA<sub>v0</sub> and WRF-Chem significantly  
526 overestimate O<sub>3</sub> (Figure 9) and largely underestimate PM<sub>2.5</sub> (Figure 10) in the region. More in situ  
527 observations or future field campaigns in the region can substantially help in the understanding  
528 model-satellite and model-in situ observation discrepancies and improving model performance.

529 The  $30^\circ\text{E} - 45^\circ\text{E}$ ,  $5^\circ\text{S} - 5^\circ\text{N}$  region in East Africa is potentially a favorable location for  
530 future field campaign(s) not only because of the large model-satellite and model-in situ observation  
531 discrepancies, but also due to that the population density is high and landcover are diverse in the  
532 region (Figure 8). The relatively high population density in the region indicates that improved air  
533 quality modeling in the region can benefit a large population. And a diverse landcover indicates  
534 more processes/environments can be sampled. CO tracers in the model (Figure 14) show that CO  
535 over the region is mainly driven by both anthropogenic and fire emissions. Anthropogenic  
536 emissions play a more important role in this region compared to East Africa in general (Figures 4  
537 and 14). In terms of source regions, emissions from East Africa and inflow from outside the  
538 continent are the dominant source, with some contributions from Central Africa. Note that the  
539 source analyses using model tracers may be subject to uncertainties in the emission inventories.  
540 As discussed above (e.g., Section 3.4), there might be missing sources in the region. Therefore, a  
541 field campaign in the region can help address this issue.

542 We would like to point out that in this analysis, the key area is selected using 3 satellite  
543 products/chemical species and two models. The Taylor score is a comprehensive measure of model  
544 performance that accounts for variance and correlation, however, other models and types of  
545 comparisons may provide different answers.

546

## 547 5. Conclusions

548 Africa is one of the most rapidly changing regions in the world and air pollution is a  
549 growing issue at multiple scales over the continent. MUSICA<sub>v0</sub> is a new community modeling  
550 infrastructure that enables the study of atmospheric composition and chemistry across all relevant

551 scales. We developed a MUSICAv0 grid with Africa refinement (~28 km × 28 km over Africa and  
552 ~110 km × 110 km for the rest of the world) and conducted the simulation for the year 2017. We  
553 evaluated the model with in situ observations including ATom-2 and ATom-3 airborne  
554 measurements of CO, NO, and O<sub>3</sub>, IAGOS airborne measurements of CO and O<sub>3</sub>, O<sub>3</sub> profiles from  
555 ozonesondes, surface CO observations from WDGCC, and surface PM<sub>2.5</sub> observations from two  
556 U.S. Embassy locations. We then compare MUSICAv0 with satellite products over Africa, namely  
557 MOPITT CO column, MODIS AOD, OMI tropospheric NO<sub>2</sub> column, and OMI tropospheric  
558 HCHO column. Results from a WRF-Chem simulation were also included in the evaluations and  
559 comparisons as a reference. Lastly, as an application of the model, we identified potential African  
560 regions for in situ observations and field campaign(s) based on model-satellite discrepancies  
561 (quantified by Taylor score), with regard to model-in situ observation discrepancies, source  
562 analyses, population, and land cover. The main conclusions are as follows.

563 (1) When comparing to ATom-2 and ATom-3, MUSICAv0 consistently underestimates  
564 CO globally. Overall, the negative model bias increases with latitude from the Southern  
565 Hemisphere to the Northern Hemisphere. MUSICAv0 also tends to overestimate O<sub>3</sub> in the  
566 stratosphere/UTLS, and the positive model bias overall decreases with altitude.

567 (2) The MUSICAv0 biases in O<sub>3</sub> when compared to ATom, IAGOS, and ozonesondes are  
568 likely driven by stratosphere-to-troposphere fluxes of O<sub>3</sub> and lightning NO emissions.

569 (3) Overall, the performance of MUSICAv0 and WRF-Chem are similar when compared  
570 to the surface CO observations from six WDCGG sites in Africa.

571 (4) Both models have negative bias compared to the MOPITT CO column, especially over  
572 Central Africa in September, which is likely driven by fires.

573 (5) Overall, MUSICAv0 agrees better with OMI tropospheric NO<sub>2</sub> column than WRF-  
574 Chem.

575 (6) MUSICAv0 overall has a lower tropospheric HCHO column than OMI retrievals in all  
576 regions and seasons. Biogenic and fire emissions are likely to be the main driver of this  
577 disagreement.

578 (7) Over Africa, the MUSICAv0 simulation has smaller mean bias and RMSE compared  
579 to MODIS AOD than the WRF-Chem simulation.

580 (8) The 30°E – 45°E, 5°S – 5°N region in East Africa is potentially a favorable location for  
581 future field campaign(s) not only because of the large model-satellite and model-in situ  
582 observation discrepancies, but also due to the population density, landcover, and pollution  
583 source in this region.

584 Overall, the performance of MUSICAv0 is comparable to WRF-Chem. The  
585 underestimation of CO is a common issue in atmospheric chemistry models such as MUSICAv0  
586 and WRF-Chem. The overestimation of O<sub>3</sub> in MUSICAv0 is likely driven by too strong of  
587 stratosphere-to-troposphere fluxes of O<sub>3</sub> and perhaps an over-estimate of lightning NO emissions,  
588 however, future studies are needed to confirm and solve this issue. The significant underestimation  
589 in surface PM<sub>2.5</sub> at two sites in East Africa and the overall overestimation in AOD in Africa  
590 compared to MODIS imply missing local sources and an overestimation of dust emissions, and  
591 require further study. Field campaigns and more in situ observations in 30°E–45°E, 5°S–5°N  
592 region in East Africa are necessary for the improvement of atmospheric chemistry model(s) as

593 shown by the MUSICAv0 and WRF-Chem simulations. In the future, we plan to conduct a model  
594 simulation for multiple years and develop additional model grids with potentially higher resolution  
595 in Africa sub-regions based on the current MUSICAv0 Africa grid.

596

### 597 **Code and data availability**

598 The model code used here can be accessed through <https://doi.org/10.5281/zenodo.8051435>. The  
599 data produced by this study can be accessed through <https://doi.org/10.5281/zenodo.8051443>.

600

### 601 **Acknowledgement**

602 This material is based upon work partially supported by the National Aeronautics and Space  
603 Administration under Grant No. 80NSSC23K0181 issued through the NASA Applied Sciences  
604 SERVIR program. We thank ATom, WDCGG, IAGOS, NASA/GSFC SHADOZ teams, and the  
605 U.S. State Department and the U.S. EPA for in situ observations. We thank Anne Thompson and  
606 Gonzague Romanens for detailed explanation of SHADOZ Ozonesonde data format. We thank  
607 MOPITT, MODIS AOD, OMI NO<sub>2</sub> and OMI HCHO teams for the satellite products. The NCAR  
608 MOPITT project is supported by the National Aeronautics and Space Administration (NASA)  
609 Earth Observing System (EOS) program. We thank the QA4ECV project. We thank Sabine Darras  
610 for CAMSv5.1 emissions. We would like to acknowledge high-performance computing support  
611 from Cheyenne (doi:10.5065/D6RX99HX) provided by NCAR's Computational and Information  
612 Systems Laboratory, sponsored by the National Science Foundation. This material is based upon  
613 work supported by the National Center for Atmospheric Research, which is a major facility  
614 sponsored by the National Science Foundation under Cooperative Agreement No. 1852977. We  
615 thank James Hannigan, Ivan Ortega, Siyuan Wang, and all the attendees of ACOM CAM-  
616 chem/MUSICA weekly meeting for helpful discussions.

### 617 **Competing interests**

618 The contact author has declared that neither they nor their co-authors have any competing  
619 interests.

620

### 621 **Author contributions**

622 WT, LKE, HMW, and PL were involved in the initial design of this study. WT led the analysis.  
623 RK and CH conducted the WRF-Chem simulation. ZZ interpreted PM<sub>2.5</sub> results. BG, ST, SM  
624 and other coauthors provide discussions. RRB helped with QFED emissions. CG and AS produced  
625 CAMSv5.1 emissions. KM, BCD, JP, and CT conducted measurements during ATom. WT  
626 prepared the paper with improvements from all coauthors.

627

628

629

630

### **Reference**

631 Baudoin, M.A., Vogel, C., Nortje, K. and Naik, M., 2017. Living with drought in South Africa:  
632 lessons learnt from the recent El Niño drought period. International journal of disaster risk  
633 reduction, 23, pp.128-137.

**Moved up [1]:** The MUSICAv0 model source code and the model documentation can be downloaded through <https://wiki.ucar.edu/display/MUSICA/MUSICA+Home> (last access: 3 April 2023). CAMS-GLOB-ANTH version 5.1 emissions can be found at <https://eccad3.sedoo.fr/data> (last access: 3 April 2023). QFED emissions can be found at <https://portal.nccs.nasa.gov/datashare/jcsa/aerosol/emissions/QFED/> (last access: 3 April 2023). MERRA-2 data can be found at <https://disc.gsfc.nasa.gov/datasets?project=MERRA-2> (last access: 3 April 2023). ATom data are available at <https://espoarchive.nasa.gov/archive/browse/atom> (last access: 3 April 2023). WDCGG data are available at <https://gaw.kishou.go.jp/> (last access: 3 April 2023). IAGOS data are available at <https://www.iagos.org/iagos-data/> (last access: 3 April 2023). NASA/GSFC SHADOZ data are available at <https://tropo.gsfc.nasa.gov/shadoz/> (last access: 3 April 2023). The surface PM<sub>2.5</sub> data used in this study are available through data are available through <https://www.aimow.gov/international/us-embassies-and-consulates/> (last access: 3 April 2023). MOPITT CO and MODIS AOD data can be accessed through <https://search.earthdata.nasa.gov/search> (last access: 3 April 2023). OMI NO<sub>2</sub> and OMI HCHO data are available at <https://www.temis.nl/qa4ecv/no2.html> (last access: 3 April 2023) and <https://www.temis.nl/qa4ecv/hcho.html> (last access: 3 April 2023), respectively.

**Moved up [2]:** CAMS-GLOB-ANTH version 5.1 emissions can be found at <https://eccad3.sedoo.fr/data> (last access: 3 April 2023). QFED emissions can be found at <https://portal.nccs.nasa.gov/datashare/jcsa/aerosol/emissions/QFED/> (last access: 3 April 2023). MERRA-2 data can be found at <https://disc.gsfc.nasa.gov/datasets?project=MERRA-2> (last access: 3 April 2023). ATom data are available at <https://espoarchive.nasa.gov/archive/browse/atom> (last access: 3 April 2023). WDCGG data are available at <https://gaw.kishou.go.jp/> (last access: 3 April 2023). IAGOS data are available at <https://www.iagos.org/iagos-data/> (last access: 3 April 2023). NASA/GSFC SHADOZ data are available at <https://tropo.gsfc.nasa.gov/shadoz/> (last access: 3 April 2023). The surface PM<sub>2.5</sub> data used in this study are available through data are available through <https://www.aimow.gov/international/us-embassies-and-consulates/> (last access: 3 April 2023). MOPITT CO and MODIS AOD data can be accessed through

**Deleted:** The MUSICAv0 model source code and the model documentation can be downloaded through <https://wiki.ucar.edu/display/MUSICA/MUSICA+Home> (last access: 3 April 2023). CAMS-GLOB-ANTH version 5.1 emissions can be found at <https://eccad3.sedoo.fr/data> (last access: 3 April 2023). QFED emissions can be found at <https://portal.nccs.nasa.gov/datashare/jcsa/aerosol/emissions/QFED/> (last access: 3 April 2023). MERRA-2 data can be found at <https://disc.gsfc.nasa.gov/datasets?project=MERRA-2> (last access: 3 April 2023). ATom data are available at [...](#) [1]

**Formatted:** Normal (Web), Left, Space Before: 0 pt, After: 7.5 pt

**Formatted:** Font: Font color: Auto

689 Bauer, S. E., Im, U., Mezuman, K., & Gao, C. Y. (2019). Desert dust, industrialization, and  
690 agricultural fires: Health impacts of outdoor air pollution in Africa. *Journal of Geophysical*  
691 *Research: Atmospheres*, 124, 4104– 4120. <https://doi.org/10.1029/2018JD029336>.

692 Boone, A.A., Xue, Y., De Sales, F., Comer, R.E., Hagos, S., Mahanama, S., Schiro, K., Song, G.,  
693 Wang, G., Li, S. and Mechosso, C.R., 2016. The regional impact of Land-Use Land-cover Change  
694 (LULCC) over West Africa from an ensemble of global climate models under the auspices of the  
695 WAMME2 project. *Climate Dynamics*, 47(11), pp.3547-3573.

696 Brown, F., Folberth, G. A., Sitch, S., Bauer, S., Bauters, M., Boeckx, P., Cheesman, A. W., Deushi,  
697 M., Dos Santos Vieira, I., Galy-Lacaux, C., Haywood, J., Keeble, J., Mercado, L. M., O'Connor,  
698 F. M., Oshima, N., Tsigaridis, K., and Verbeek, H., 2022. The ozone–climate penalty over South  
699 America and Africa by 2100, *Atmos. Chem. Phys.*, 22, 12331–12352, [https://doi.org/10.5194/acp-](https://doi.org/10.5194/acp-22-12331-2022)  
700 [22-12331-2022](https://doi.org/10.5194/acp-22-12331-2022).  
701

702 Boersma, K. F., Eskes, H., Richter, A., De Smedt, I., Lorente, A., Beirle, S., Van Geffen, J., Peters,  
703 E., Van Roozendael, M. and Wagner, T., (2017a). QA4ECV NO2 tropospheric and stratospheric  
704 vertical column data from OMI (Version 1.1). Royal Netherlands Meteorological Institute  
705 (KNMI). <http://doi.org/10.21944/qa4ecv-no2-omi-v1.1>.  
706

707 Boersma, K.F., van Geffen, J., Eskes, H., van der A, R., De Smedt, I. and Van Roozendael, M.,  
708 2017b. Product specification document for the QA4ECV NO2 ECV precursor product.  
709

710 Bourgeois, I., Peischl, J., Thompson, C. R., Aikin, K. C., Campos, T., Clark, H., Commane, R.,  
711 Daube, B., Diskin, G. W., Elkins, J. W., Gao, R.-S., Gaudel, A., Hints, E. J., Johnson, B. J., Kivi,  
712 R., McKain, K., Moore, F. L., Parrish, D. D., Querel, R., Ray, E., Sánchez, R., Sweeney, C.,  
713 Tarasick, D. W., Thompson, A. M., Thouret, V., Witte, J. C., Wofsy, S. C., and Ryerson, T. B.:  
714 Global-scale distribution of ozone in the remote troposphere from the ATom and HIPPO airborne  
715 field missions, *Atmos. Chem. Phys.*, 20, 10611–10635, [https://doi.org/10.5194/acp-20-10611-](https://doi.org/10.5194/acp-20-10611-2020)  
716 [2020](https://doi.org/10.5194/acp-20-10611-2020), 2020.  
717

718 Bourgeois, I., Peischl, J., Neuman, J.A., Brown, S.S., Thompson, C.R., Aikin, K.C., Allen, H.M.,  
719 Angot, H., Apel, E.C., Baublitz, C.B. and Brewer, J.F., 2021. Large contribution of biomass  
720 burning emissions to ozone throughout the global remote troposphere. *Proceedings of the National*  
721 *Academy of Sciences*, 118(52), p.e2109628118.  
722

723 Center for International Earth Science Information Network (CIESIN), Columbia University.  
724 2018. Documentation for the Gridded Population of the World, Version 4 (GPWv4), Revision 11  
725 Data Sets. Palisades NY: NASA Socioeconomic Data and Applications Center (SEDAC).  
726 <https://doi.org/10.7927/H45Q4T5F> Accessed 2022-11-17.

727 Chin, M., Ginoux, P., Kinne, S., Torres, O., Holben, B.N., Duncan, B.N., Martin, R.V., Logan,  
728 J.A., Higurashi, A., Nakajima, T., 2002. Tropospheric aerosol optical thickness from the GOCART  
729 model and comparisons with satellite and sun photometer measurements. *J. Atmos. Sci.* 59, 461–  
730 483. [https://doi.org/10.1175/1520-0469\(2002\)059<0461:TAOTFT>2.0.CO;2](https://doi.org/10.1175/1520-0469(2002)059<0461:TAOTFT>2.0.CO;2).

731 Clarke, K., Ash, K., Coker, E.S., Sabo-Attwood, T. and Bainomugisha, E., 2022. A Social  
732 Vulnerability Index for Air Pollution and Its Spatially Varying Relationship to PM<sub>2.5</sub> in Uganda.  
733 *Atmosphere*, 13(8), p.1169.

734 Compernelle, S., Verhoelst, T., Pinardi, G., Granville, J., Hubert, D., Keppens, A., Niemeijer, S.,  
735 Rino, B., Bais, A., Beirle, S., Boersma, F., Burrows, J. P., De Smedt, I., Eskes, H., Goutail, F.,  
736 Hendrick, F., Lorente, A., Pazmino, A., Piters, A., Peters, E., Pommereau, J.-P., Remmers, J.,  
737 Richter, A., van Geffen, J., Van Roozendael, M., Wagner, T., and Lambert, J.-C.: Validation of  
738 Aura-OMI QA4ECV NO<sub>2</sub> climate data records with ground-based DOAS networks: the role of  
739 measurement and comparison uncertainties, *Atmos. Chem. Phys.*, 20, 8017–8045,  
740 <https://doi.org/10.5194/acp-20-8017-2020>, 2020.

741 Darnenov, A., & da Silva, A. (2013). The quick fire emissions dataset (QFED)—documentation of  
742 versions 2.1, 2.2 and 2.4. NASA Technical Report Series on Global Modeling and Data  
743 Assimilation, NASA TM-2013-104606, 32, 183.

744 De Longueville, F., Hountondji, Y.C., Henry, S. and Ozer, P., 2010. What do we know about  
745 effects of desert dust on air quality and human health in West Africa compared to other regions?.  
746 *Science of the total environment*, 409(1), pp.1-8.

747 De Smedt, I., Yu, H., Richter, A., Beirle, S., Eskes, H., Boersma, K.F., Van Roozendael, M., Van  
748 Geffen, J., Lorente, A. and Peters, E., (2017a), QA4ECV HCHO tropospheric column data from  
749 OMI (Version 1.1). Royal Belgian Institute for Space Aeronomy.  
750 <http://doi.org/10.18758/71021031>.

751 De Smedt, I., Van Geffen, J., Richter, A., Beirle S., Yu, H., Vlietinck J., Van Roozendael, M. van  
752 der A R., Lorente A., Scanlon T., Compernelle S., Wagner T., Boersma, K. F., Eskes, H., 2017b,  
753 Product User Guide for HCHO.

754 Deeter, M.N., 2009. MOPITT (Measurements of Pollution in the Troposphere) Validated Version  
755 4 Product User's Guide. National Centre for Atmospheric Research, Boulder, CO, 80307.

756 Deeter, M. N., Worden, H. M., Gille, J. C., Edwards, D. P., Mao, D., and Drummond, J. R.:  
757 MOPITT multispectral CO retrievals: Origins and effects of geophysical radiance errors, *J.*  
758 *Geophys. Res.*, 116, D15303, <https://doi.org/10.1029/2011JD015703>, 2011.

759 Deeter, M., Francis, G., Gille, J., Mao, D., Martínez-Alonso, S., Worden, H., Ziskin, D.,  
760 Drummond, J., Commane, R., Diskin, G., and McKain, K.: The MOPITT Version 9 CO product:  
761 sampling enhancements and validation, *Atmos. Meas. Tech.*, 15, 2325–2344,  
762 <https://doi.org/10.5194/amt-15-2325-2022>, 2022.

763 Emmons, L.K., Walters, S., Hess, P.G., Lamarque, J.-F., Pfister, G.G., Fillmore, D., Granier, C.,  
764 Guenther, A., Kinnison, D., Laepple, T., Orlando, J., Tie, X., Tyndall, G., Wiedinmyer, C.,  
765 Baughcum, S.L., Kloster, S., 2010. Description and evaluation of the model for ozone and related  
766 chemical tracers, version 4 (MOZART-4). *Geosci. Model Dev.* 3, 43–67.  
767 <https://doi.org/10.5194/gmd-3-43-2010>.



768 Emmons, L.K., Schwantes, R. H., Orlando, J. J., Tyndall, G., Kinnison, D., Lamarque, J.-F., et al. :  
769 The Chemistry Mechanism in the Community Earth System Model version 2 (CESM2), *Journal*  
770 *of Advances in Modeling Earth Systems*, 12, <https://doi.org/10.1029/2019MS001882>, 2020.

771 Fisher, J. A., Murray, L. T., Jones, D. B. A., & Deutscher, N. M. (2017). Improved method for  
772 linear carbon monoxide simulation and source attribution in atmospheric chemistry models  
773 illustrated using GEOS-Chem v9. *Geoscientific Model Development*, 10, 4129–4144.  
774 <https://doi.org/10.5194/gmd-10-4129-2017>.

775 Fisher, S., Bellinger, D.C., Cropper, M.L., Kumar, P., Binagwaho, A., Koudenoukpo, J.B., Park,  
776 Y., Taghian, G. and Landrigan, P.J., 2021. Air pollution and development in Africa: impacts on  
777 health, the economy, and human capital. *The Lancet Planetary Health*, 5(10), pp.e681-e688.

778 Friedl, M., D. Sulla-Menashe. MODIS/Terra+Aqua Land Cover Type Yearly L3 Global 0.05Deg  
779 CMG V061. 2022, distributed by NASA EOSDIS Land Processes DAAC,  
780 <https://doi.org/10.5067/MODIS/MCD12C1.061>. Accessed 2022-11-17.

781 Gaubert, B., Arellano, A. F., Barré, J., Worden, H. M., Emmons, L. K., Tilmes, S., Buchholz, R.  
782 R., Vitt, F., Raeder, K., Collins, N., Anderson, J. L., Wiedinmyer, C., Martínez-Alonso, S.,  
783 Edwards, D. P., Andreae, M. O., Hannigan, J. W., Petri, C., Strong, K., and Jones, N.: Toward a  
784 chemical reanalysis in a coupled chemistry-climate model: An evaluation of MOPITT CO  
785 assimilation and its impact on tropospheric composition, *J. Geophys. Res.-Atmos.*, 121, 7310–  
786 7343, <https://doi.org/10.1002/2016JD024863>, 2016.

787 Gaubert, B., Emmons, L. K., Raeder, K., Tilmes, S., Miyazaki, K., Arellano Jr., A. F., Elguindi,  
788 N., Granier, C., Tang, W., Barré, J., Worden, H. M., Buchholz, R. R., Edwards, D. P., Franke, P.,  
789 Anderson, J. L., Saunio, M., Schroeder, J., Woo, J.-H., Simpson, I. J., Blake, D. R., Meinardi, S.,  
790 Wennberg, P. O., Crounse, J., Teng, A., Kim, M., Dickerson, R. R., He, H., Ren, X., Pusede, S. E.,  
791 and Diskin, G. S.: Correcting model biases of CO in East Asia: impact on oxidant distributions  
792 during KORUS-AQ, *Atmos. Chem. Phys.*, 20, 14617–14647, <https://doi.org/10.5194/acp-20-14617-2020>, 2020.

794 Gelaro, R., McCarty, W., Suárez, M. J., Todling, R., Molod, A., Takacs, L., et al. (2017). The  
795 modern-era retrospective analysis for research and applications, version 2 (MERRA-2). *Journal of*  
796 *Climate*, 30(14), 5419-5454.

797 Güneralp, B., Lwasa, S., Masundire, H., Parnell, S. and Seto, K.C., 2017. Urbanization in Africa:  
798 challenges and opportunities for conservation. *Environmental research letters*, 13(1), p.015002.

799 Heft-Neal, S., Burney, J., Bendavid, E. and Burke, M., 2018. Robust relationship between air  
800 quality and infant mortality in Africa. *Nature*, 559(7713), pp.254-258.

801 Hsu, N.C., Jeong, M.J., Bettenhausen, C., Sayer, A.M., Hansell, R., Seftor, C.S., Huang, J. and  
802 Tsay, S.C., 2013. Enhanced Deep Blue aerosol retrieval algorithm: The second generation. *Journal*  
803 *of Geophysical Research: Atmospheres*, 118(16), pp.9296-9315.

804 Jo, D., et al., Effects of Grid Resolution and Emission Inventory on Urban Air Quality Simulation  
805 With the Multi-Scale Infrastructure for Chemistry and Aerosols (MUSICA) Version 0, JAMES,  
806 in review, 2022.

807 Kuik, F., Lauer, A., Beukes, J. P., Van Zyl, P. G., Josipovic, M., Vakkari, V., Laakso, L., and Feig,  
808 G. T.: The anthropogenic contribution to atmospheric black carbon concentrations in southern  
809 Africa: a WRF-Chem modeling study, *Atmos. Chem. Phys.*, 15, 8809–8830,  
810 <https://doi.org/10.5194/acp-15-8809-2015>, 2015.

811 Kumar, R., He, C., Bhardwaj, P., Lacey, F., Buchholz, R.R., Brasseur, G.P., Joubert, W.,  
812 Labuschagne, C., Kozlova, E. and Mkololo, T., 2022. Assessment of regional carbon monoxide  
813 simulations over Africa and insights into source attribution and regional transport. *Atmospheric*  
814 *Environment*, 277, p.119075.

815 Lacey, F. G., Marais, E. A., Henze, D. K., Lee, C. J., van Donkelaar, A., Martin, R. V., et al. (2017).  
816 Improving present day and future estimates of anthropogenic sectoral emissions and the resulting  
817 air quality impacts in Africa. *Faraday Discussions*, 200, 397–412.  
818 <https://doi.org/10.1039/C7FD00011A>.

819 Lauritzen, P. H., Nair, R. D., Herrington, A. R., Callaghan, P., Goldhaber, S., Dennis, J. M.,  
820 Bacmeister, J. T., Eaton, B. E., Zarzycki, C. M., Taylor, M. A., Ullrich, P. A., Dubos, T., Gettelman,  
821 A., Neale, R. B., Dobbins, B., Reed, K. A., Hannay, C., Medeiros, B., Benedict, J. J. and Tribbia,  
822 J. J.: NCAR Release of CAM-SE in CESM2.0: A Reformulation of the Spectral Element  
823 Dynamical Core in Dry-Mass Vertical Coordinates With Comprehensive Treatment of  
824 Condensates and Energy, *Journal of Advances in Modeling Earth Systems*, 10(7), 1537–1570,  
825 2018.

826 Levy, R. C., Mattoo, S., Munchak, L. A., Remer, L. A., Sayer, A. M., Patadia, F., and Hsu, N. C.:  
827 The Collection 6 MODIS aerosol products over land and ocean, *Atmos. Meas. Tech.*, 6, 2989–  
828 3034, <https://doi.org/10.5194/amt-6-2989-2013>, 2013.

829 Levy, R., Hsu, C., et al., 2017. MODIS Atmosphere L2 Aerosol Product. NASA MODIS Adaptive  
830 Processing System, Goddard Space Flight Center, USA:  
831 [http://dx.doi.org/10.5067/MODIS/MOD04\\_L2.061](http://dx.doi.org/10.5067/MODIS/MOD04_L2.061).

832 Lioussé, C., Assamoi, E., Criqui, P., Granier, C., and Rosset, R.: Explosive growth in African  
833 combustion emissions from 2005 to 2030, *Environ. Res. Lett.*, 9, 35003,  
834 <https://doi.org/10.1088/1748-9326/9/3/035003>, 2014.

835 Liu, J. C., Mickley, L. J., Sulprizio, M. P., Dominici, F., Yue, X., Ebisu, K., ... & Bell, M. L. (2016).  
836 Particulate air pollution from wildfires in the Western US under climate change. *Climatic change*,  
837 138(3), 655-666.

838 Malings, C., Westervelt, D. M., Hauryliuk, A., Presto, A. A., Grieshop, A., Bittner, A., Beekmann,  
839 M., and R. Subramanian: Application of low-cost fine particulate mass monitors to convert satellite  
840 aerosol optical depth to surface concentrations in North America and Africa, *Atmos. Meas. Tech.*,  
841 13, 3873–3892, <https://doi.org/10.5194/amt-13-3873-2020>, 2020.

842 Marais, E. A., Jacob, D. J., Kurosu, T. P., Chance, K., Murphy, J. G., Reeves, C., Mills, G., Casadio,  
843 S., Millet, D. B., Barkley, M. P., Paulot, F., and Mao, J.: Isoprene emissions in Africa inferred  
844 from OMI observations of formaldehyde columns, *Atmos. Chem. Phys.*, 12, 6219–6235,  
845 <https://doi.org/10.5194/acp-12-6219-2012>, 2012.

846 Marais, E.A., Silvern, R.F., Vodonos, A., Dupin, E., Bockarie, A.S., Mickley, L.J. and Schwartz,  
847 J., 2019. Air quality and health impact of future fossil fuel use for electricity generation and  
848 transport in Africa. *Environmental science & technology*, 53(22), pp.13524-13534.

849 Mazzeo, A., Burrow, M., Quinn, A., Marais, E. A., Singh, A., Ng'ang'a, D., Gatari, M. J., and Pope,  
850 F. D.: Evaluation of the WRF and CHIMERE models for the simulation of PM<sub>2.5</sub> in large East  
851 African urban conurbations, *Atmos. Chem. Phys.*, 22, 10677–10701, [https://doi.org/10.5194/acp-](https://doi.org/10.5194/acp-22-10677-2022)  
852 [22-10677-2022](https://doi.org/10.5194/acp-22-10677-2022), 2022.

853 Menut, L., Flamant, C., Turquety, S., Deroubaix, A., Chazette, P., and Meynadier, R.: Impact of  
854 biomass burning on pollutant surface concentrations in megacities of the Gulf of Guinea, *Atmos.*  
855 *Chem. Phys.*, 18, 2687–2707, <https://doi.org/10.5194/acp-18-2687-2018>, 2018.

856 Nicholson, S.E., 2019. A review of climate dynamics and climate variability in Eastern Africa.  
857 The limnology, climatology and paleoclimatology of the East African lakes, pp.25-56.

858 Paton-Walsh, C., Emmerson, K.M., Garland, R.M., Keywood, M., Hoelzemann, J.J., Huneus, N.,  
859 Buchholz, R.R., Humphries, R.S., Altieri, K., Schmale, J. and Wilson, S.R., 2022. Key challenges  
860 for tropospheric chemistry in the Southern Hemisphere. *Elem Sci Anth*, 10(1), p.00050.

861 Petkova, E.P., Jack, D.W., Volavka-Close, N.H. and Kinney, P.L., 2013. Particulate matter  
862 pollution in African cities. *Air Quality, Atmosphere & Health*, 6(3), pp.603-614.

863 Petzold, A., Thouret, V., Gerbig, C., Zahn, A., Brenninkmeijer, C.A., Gallagher, M., Hermann,  
864 M., Pontaud, M., Ziereis, H., Boulanger, D. and Marshall, J., 2015. Global-scale atmosphere  
865 monitoring by in-service aircraft—current achievements and future prospects of the European  
866 Research Infrastructure IAGOS. *Tellus B: Chemical and Physical Meteorology*, 67(1), p.28452.

867 Pfister, G. G., Eastham, S. D., Arellano, A. F., Aumont, B., Barsanti, K. C., Barth, M. C., ... &  
868 Brasseur, G. P. (2020). The Multi-Scale Infrastructure for Chemistry and Aerosols (MUSICA).  
869 *Bulletin of the American Meteorological Society*, 101(10), E1743-E1760.

870 Schwantes, R.H., Lacey, F.G., Tilmes, S., Emmons, L.K., Lauritzen, P.H., Walters, S., Callaghan,  
871 P., Zarzycki, C.M., Barth, M.C., Jo, D.S. and Bacmeister, J.T., 2022. Evaluating the impact of  
872 chemical complexity and horizontal resolution on tropospheric ozone over the conterminous US  
873 with a global variable resolution chemistry model. *Journal of Advances in Modeling Earth Systems*,  
874 14(6), p.e2021MS002889.

875 Shindell, D. T., Faluvegi, G., Stevenson, D. S., Krol, M. C., Emmons, L. K., Lamarque, J. F., et  
876 al. (2006). Multimodel simulations of carbon monoxide: Comparison with observations and  
877 projected near-future changes. *Journal of Geophysical Research*, 111.

878 Soulie, A., C. Granier, S. Darras, T. Doumbia, M. Guevara, J.-P. Jalkanen, S. Keita, C. Liousse,  
879 Global anthropogenic emissions (CAM5-GLOB-ANT) for the Copernicus Atmosphere  
880 Monitoring Service Air Quality Forecasts and Reanalysis, to be submitted to Earth Sys. Sci. data,  
881 2023.

882 Stauffer, R.M., Thompson, A.M., Kollonige, D.E., Witte, J.C., Tarasick, D.W., Davies, J., Vömel,  
883 H., Morris, G.A., Van Malderen, R., Johnson, B.J. and Querel, R.R., 2020. A post-2013 dropoff  
884 in total ozone at a third of global ozonesonde stations: Electrochemical concentration cell  
885 instrument artifacts?. *Geophysical Research Letters*, 47(11), p.e2019GL086791.

886 Stein, O., Schultz, M. G., Bouarar, I., Clark, H., Huijnen, V., Gaudel, A., et al. (2014). On the  
887 wintertime low bias of Northern Hemisphere carbon monoxide found in global model simulations.  
888 *Atmospheric Chemistry and Physics*, 14, 9295–9316.

889 Tang, W., Arellano, A. F., DiGangi, J. P., Choi, Y., Diskin, G. S., Agustí-Panareda, A., Parrington,  
890 M., Massart, S., Gaubert, B., Lee, Y., Kim, D., Jung, J., Hong, J., Hong, J.-W., Kanaya, Y., Lee,  
891 M., Stauffer, R. M., Thompson, A. M., Flynn, J. H., and Woo, J.-H.: Evaluating high-resolution  
892 forecasts of atmospheric CO and CO<sub>2</sub> from a global prediction system during KORUS-AQ field  
893 campaign, *Atmos. Chem. Phys.*, 18, 11007–11030, <https://doi.org/10.5194/acp-18-11007-2018>,  
894 2018.

895 Tang, W., Emmons, L. K., Arellano Jr., A. F., Gaubert, B., Knote, C., Tilmes, S., Buchholz, R. R.,  
896 Pfister, G. G., Diskin, G. S., Blake, D. R., Blake, N. J., Meinardi, S., DiGangi, J. P., Choi, Y., Woo,  
897 J.-H., He, C., Schroeder, J. R., Suh, I., Lee, H.-J., Jo, H.-Y., Kanaya, Y., Jung, J., Lee, Y., and Kim,  
898 D.: Source contributions to carbon monoxide concentrations during KORUS-AQ based on CAM-  
899 chem model applications, *J. Geophys. Res.-Atmos.*, 124, 1–27,  
900 <https://doi.org/10.1029/2018jd029151>, 2019.

901 Tang, W., Emmons, L.K., Buchholz, R.R., Wiedinmyer, C., Schwantes, R.H., He, C., Kumar, R.,  
902 Pfister, G.G., Worden, H.M., Hornbrook, R.S. and Apel, E.C., 2022. Effects of Fire Diurnal  
903 Variation and Plume Rise on US Air Quality During FIREX-AQ and WE-CAN Based on the  
904 Multi-Scale Infrastructure for Chemistry and Aerosols (MUSICAv0). *Journal of Geophysical  
905 Research: Atmospheres*, 127(16), p.e2022JD036650.

906 Taylor, K. E. (2001). Summarizing multiple aspects of model performance in a single diagram.  
907 *Journal of Geophysical Research*, 106(1755), 7183–7192. <https://doi.org/10.1029/2000JD900719>.

908 Thompson, A. M., Balashov, N. V., Witte, J. C., Coetzee, J. G. R., Thouret, V., and Posny, F.:  
909 Tropospheric ozone increases over the southern Africa region: bellwether for rapid growth in  
910 Southern Hemisphere pollution?, *Atmos. Chem. Phys.*, 14, 9855–9869,  
911 <https://doi.org/10.5194/acp-14-9855-2014>, 2014.

912 Thompson, A. M., J. C. Witte, C., Sterling, A., Jordan, B. J., Johnson, S. J. Oltmans, ... Thiongo,  
913 K. (2017). First reprocessing of Southern Hemisphere Additional Ozonesondes (SHADOZ) ozone  
914 profiles (1998-2016): 2. Comparisons with satellites and ground-based instruments. *Journal of  
915 Geophysical Research: Atmospheres*, 122, 13,000-13,025. <https://doi.org/10.1002/2017JD027406>.

916 Thompson, C. R., Wofsy, S. C., Prather, M. J., Newman, P. A., Hanisco, T. F., Ryerson, T. B.,  
917 Fahey, D. W., Apel, E. C., Brock, C. A., Brune, W. H., Froyd, K., Katich, J. M., Nicely, J. M.,  
918 Peischl, J., Ray, E., Veres, P. R., Wang, S., Allen, H. M., Asher, E., Bian, H., Blake, D., Bourgeois,  
919 I., Budney, J., Bui, T. P., Butler, A., Campuzano-Jost, P., Chang, C., Chin, M., Commane, R.,  
920 Correa, G., Crounse, J. D., Daube, B., Dibb, J. E., DiGangi, J. P., Diskin, G. S., Dollner, M., Elkins,  
921 J. W., Fiore, A. M., Flynn, C. M., Guo, H., Hall, S. R., Hannun, R. A., Hills, A., Hints, E. J.,  
922 Hodzic, A., Hornbrook, R. S., Huey, L. G., Jimenez, J. L., Keeling, R. F., Kim, M. J., Kupc, A.,  
923 Lacey, F., Lait, L. R., Lamarque, J., Liu, J., McKain, K., Meinardi, S., Miller, D. O., Montzka, S.,  
924 A., Moore, F. L., Morgan, E. J., Murphy, D. M., Murray, L. T., Nault, B. A., Neuman, J. A.,  
925 Nguyen, L., Gonzalez, Y., Rollins, A., Rosenlof, K., Sargent, M., Schill, G., Schwarz, J. P., Clair,  
926 J. M. S., Steenrod, S. D., Stephens, B. B., Strahan, S. E., Strode, S. A., Sweeney, C., Thames, A.,  
927 B., Ullmann, K., Wagner, N., Weber, R., Weinzierl, B., Wennberg, P. O., Williamson, C. J., Wolfe,  
928 G. M., and Zeng, L.: The NASA Atmospheric Tomography (ATom) Mission: Imaging the  
929 Chemistry of the Global Atmosphere, *B. Am. Meteorol. Soc.*, 103, E761–E790, 2022.

930 Tilmes, S., Lamarque, J. F., Emmons, L. K., Kinnison, D. E., Ma, P. L., Liu, X., et al. (2015).  
931 Description and evaluation of tropospheric chemistry and aerosols in the Community Earth System  
932 Model (CESM1. 2). *Geoscientific Model Development*, 8, 1395–1426.

933 Tilmes, S., Hodzic, A., Emmons, L. K., Mills, M. J., Gettelman, A., Kinnison, D. E., et al.: Climate  
934 forcing and trends of organic aerosols in the Community Earth System Model (CESM2). *Journal*  
935 *of Advances in Modeling Earth Systems*, 11, <https://doi.org/10.1029/2019MS001827>, 2019.

936 U.S. EPA: Quality Assurance Guidance Document 2.12: Monitoring PM<sub>2.5</sub> in Ambient Air Using  
937 Designated Reference or Class I Equivalent Methods, United States Environmental Protection  
938 Agency, available at: <https://www3.epa.gov/ttnamti1/files/ambient/pm25/qa/m212.pdf> (last  
939 access: 20 November 2022), 2016.

940 van der Werf, G. R., Randerson, J. T., Giglio, L., van Leeuwen, T. T., Chen, Y., Rogers, B. M.,  
941 Mu, M., van Marle, M. J. E., Morton, D. C., Collatz, G. J., Yokelson, R. J., and Kasibhatla, P. S.,  
942 2017. Global fire emissions estimates during 1997–2016, *Earth Syst. Sci. Data*, 9, 697–720,  
943 <https://doi.org/10.5194/essd-9-697-2017>.

944 Vohra, K., Marais, E.A., Bloss, W.J., Schwartz, J., Mickley, L.J., Van Damme, M., Clarisse, L.  
945 and Coheur, P.F., 2022. Rapid rise in premature mortality due to anthropogenic air pollution in  
946 fast-growing tropical cities from 2005 to 2018. *Science Advances*, 8(14), p.eabm4435.

947 Washington, R., Harrison, M., Conway, D., Black, E., Challinor, A., Grimes, D., Jones, R., Morse,  
948 A., Kay, G. and Todd, M., 2006. African climate change: taking the shorter route. *Bulletin of the*  
949 *American Meteorological Society*, 87(10), pp.1355-1366.

950 Watson, J. G., Chow, J. C., Moosmüller, H., Green, M., Frank, N., and Pitchford, M.: Guidance  
951 for using continuous monitors in PM<sub>2.5</sub> monitoring networks, U.S. EPA Office of Air Quality  
952 Planning and Standards, Triangle Park, NC., 1998.

953 Wiedinmyer, C., Akagi, S.K., Yokelson, R.J., Emmons, L.K., Al-Saadi, J.A., Orlando, J.J., Soja,  
954 A.J., 2011. The Fire INventory from NCAR (FINN): a high resolution global model to estimate

955 the emissions from open burning. *Geosci. Model Dev.* 4, 625–641. [https://doi.org/10.5194/gmd-](https://doi.org/10.5194/gmd-4-625-2011)  
956 4-625-2011.

957 Wiedinmyer, C., Yokelson, R. J., and Gullett, B. K.: Global emissions of trace gases, particulate  
958 matter, and hazardous air pollutants from open burning of domestic waste, *Environ. Sci. Technol.*,  
959 48, 9523–9530, <https://doi.org/10.1021/es502250z>, 2014.

960 Witte, J.C., A. M. Thompson, H. G. J. Smit, M. Fujiwara, F. Posny, Gert J. R. Coetzee, ... F. R. da  
961 Silva (2017), First reprocessing of Southern Hemisphere ADDitional OZonesondes (SHADOZ)  
962 profile records (1998-2015): 1. Methodology and evaluation, *J. Geophys. Res. Atmos.*, 122, 6611-  
963 6636. <https://doi.org/10.1002/2016JD026403>.

964 Witte, J. C., Thompson, A. M., Smit, H. G. J., Vömel, H., Posny, F., & Stübi, R. (2018). First  
965 reprocessing of Southern Hemisphere ADDitional OZonesondes profile records: 3. Uncertainty in  
966 ozone profile and total column. *Journal of Geophysical Research: Atmospheres*, 123, 3243-3268.  
967 <https://doi.org/10.1002/2017JD027791>.

968 Worden, H. M., Deeter, M. N., Edwards, D. P., Gille, J. C., Drummond, J. R., and Nédélec, P.:  
969 Observations of near-surface carbon monoxide from space using MOPITT multispectral retrievals,  
970 *J. Geophys. Res.*, 115, D18314, <https://doi.org/10.1029/2010JD014242>, 2010.

971 Ziervogel, G., New, M., Archer van Garderen, E., Midgley, G., Taylor, A., Hamann, R., Stuart-  
972 Hill, S., Myers, J. and Warburton, M., 2014. Climate change impacts and adaptation in South  
973 Africa. *Wiley Interdisciplinary Reviews: Climate Change*, 5(5), pp.605-620.

974

975

976

977

978

979

980

981

982

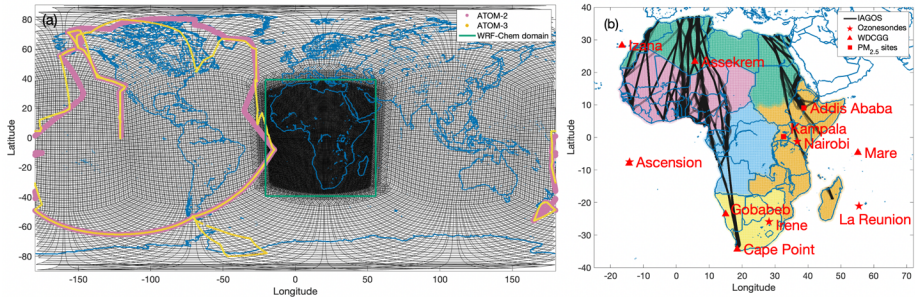

983  
 984 **Figure 1.** Model grid, in situ observations used in this study, and sub-regions in Africa. (a)  
 985 MUSICAv0 model grid developed for Africa in this study (black), domain boundary of the WRF-  
 986 Chem simulation compared in this study (shown by green box), observations from the  
 987 Atmospheric Tomography Mission (ATom) field campaign 2 (ATom-2; 2017 Jan to 2017 Feb;  
 988 pink) and ATom-3 (2017 Sep to 2017 Oct; yellow). (b) Sub-regions in Africa are shown, namely  
 989 North Africa (green), West Africa (pink), East Africa (orange), Central Africa (blue), and Southern  
 990 Africa (yellow). Location of in situ observations are labeled on the map. Flight tracks of the In-  
 991 service Aircraft for a Global Observing System (IAGOS) are shown with black lines. Four  
 992 ozonesonde sites are shown by pentagrams (Ascension, Irene, Nairobi, and La Reunion); six sites  
 993 from the World Data Centre for Greenhouse Gases are shown by triangles (Assekrem, Cape Point,  
 994 Izana, Gobabeb, Mare, and Ascension); two surface sites for PM<sub>2.5</sub> are shown by squares (Addis  
 995 Ababa and Kampala).

996  
 997  
 998  
 999

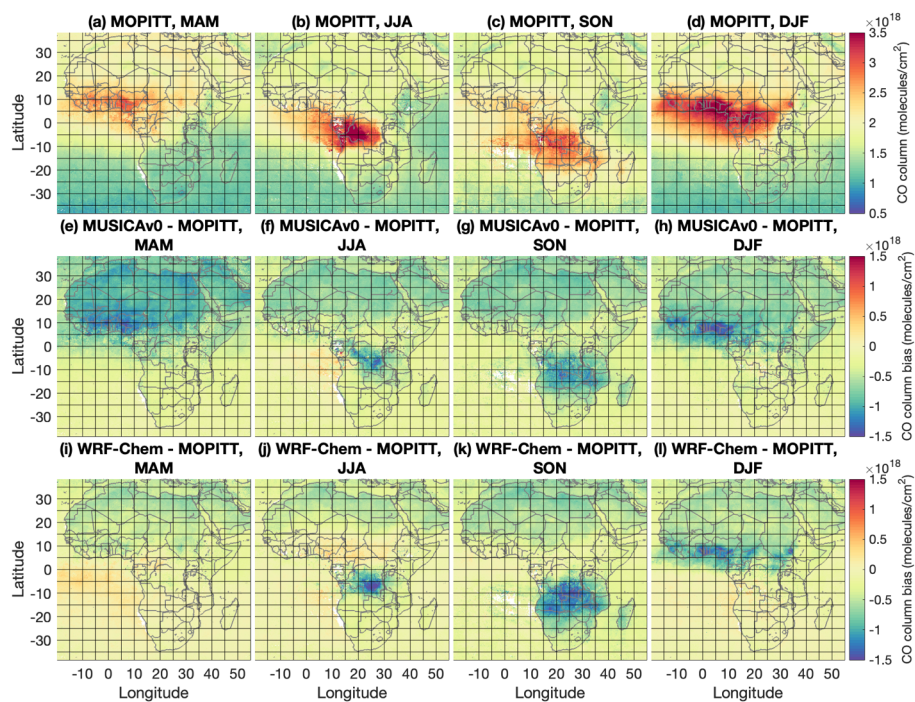

1000  
 1001  
 1002  
 1003  
 1004  
 1005  
 1006  
 1007  
 1008

**Figure 2.** Comparisons of MUSICA v0 and WRF-Chem simulations to MOPITT CO column (molecules/cm<sup>2</sup>) for each season of 2017. (a-d) Averaged MOPITT CO column: MAM (March, April, and May), JJA (June, July, and August), SON (September, October, and November), and DJF (December, January, and February). (e-h) MUSICA v0 model biases against MOPITT CO column for MAM, JJA, SON, and DJF. (i-l) is the same as (e-h) but for WRF-Chem. All data are gridded to 0.25 degree  $\times$  0.25 degree for plotting.



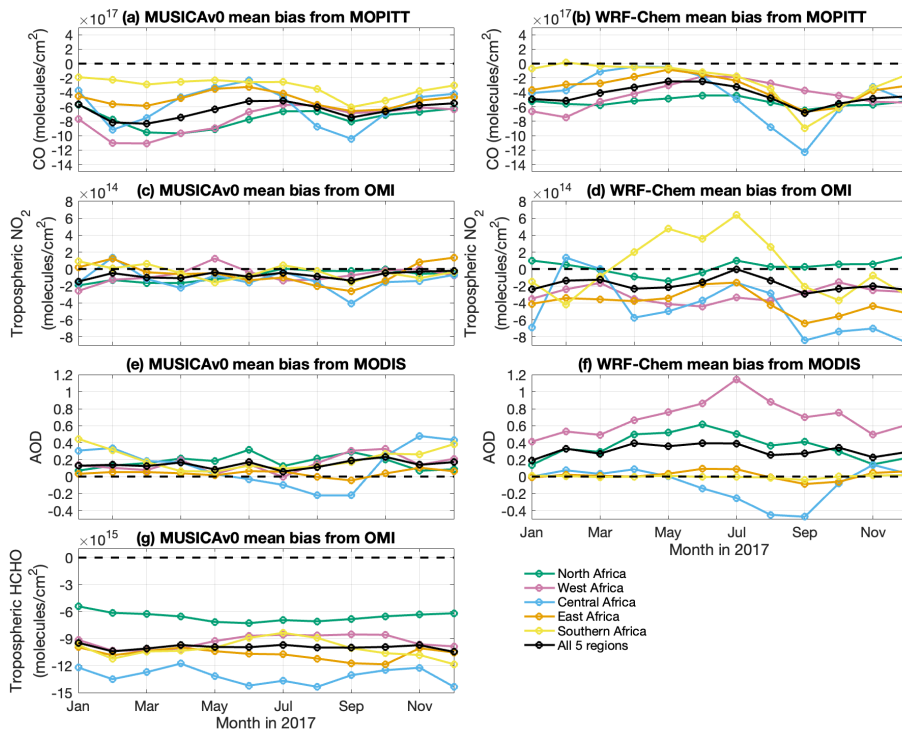

1009  
 1010  
 1011  
 1012  
 1013  
 1014  
 1015  
 1016  
 1017  
 1018

**Figure 3.** Mean bias of MUSICAv0 and WRF-Chem simulations from satellite data. Monthly timeseries of mean bias of (a) MUSICAv0 and (b) WRF-Chem against MOPITT CO column (molecules/cm<sup>2</sup>) in 2017 over Africa (black), North Africa (green), West Africa (pink), East Africa (orange), Central Africa (blue), and Southern Africa (yellow). (c-d) are same as (a-b) but for mean bias against OMI tropospheric NO<sub>2</sub> column (molecules/cm<sup>2</sup>). (e-f) are same as (a-b) but for mean bias against with MODIS (Terra) Aerosol Optical Depth (AOD). (g) is the same as (a) but for mean bias against OMI tropospheric HCHO column (molecules/cm<sup>2</sup>).

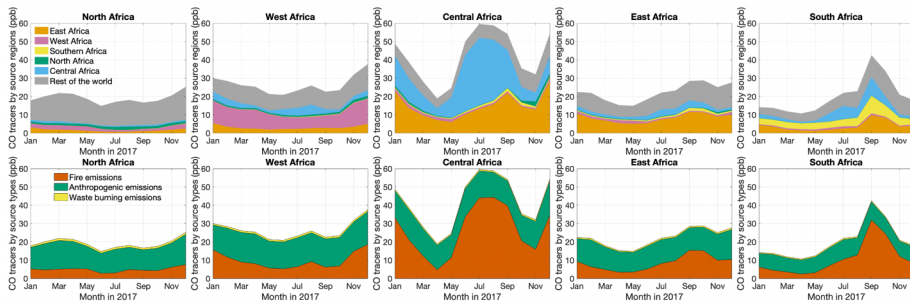

1019  
1020  
1021  
1022  
1023  
1024  
1025  
1026

**Figure 4.** Monthly time series of column-averaged CO tracers in North Africa, West Africa, East Africa, Central Africa, and Southern Africa. Top panels show CO tracers of emissions from North Africa (green), West Africa (pink), East Africa (orange), Central Africa (blue), Southern Africa (yellow), and the rest of the world (grey). Bottom panels show CO tracers of fire emissions (red), anthropogenic emissions (green), and waste burning emissions (yellow).

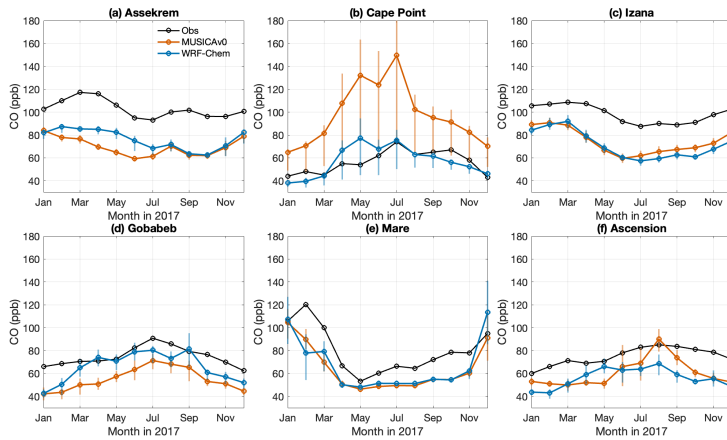

1027  
1028  
1029  
1030  
1031  
1032  
1033

**Figure 5.** Monthly mean CO (ppb) from in situ observations (black), MUSICA v0 (red), and WRF-Chem (blue) during 2017 at (a) Assekrem, (b) Cape Point, (c) Izana, (d) Gobabeb, (e) Mare and (f) Ascension (see Figure 1b for locations). Monthly means are calculated from 3-hourly data. The range for each data point shows the variation of the 3-hourly data on that day (25% quantile to 75% quantile). Observational data are from World Data Centre for Greenhouse Gases (WDCGG).

1034  
1035

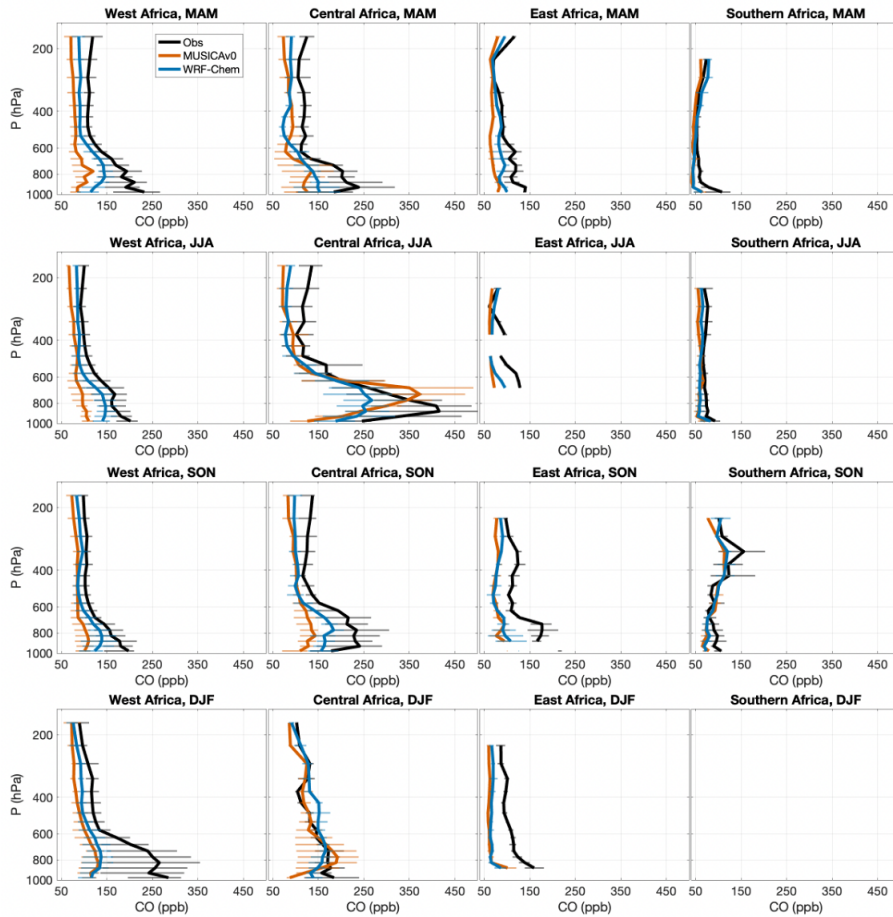

1036  
1037  
1038  
1039  
1040  
1041  
1042  
1043  
1044

**Figure 6.** Vertical profiles of CO (ppb) from the In-service Aircraft for a Global Observing System (IAGOS) measurements (black) and corresponding model output from MUSICA v0 (red), and WRF-Chem (blue) during different seasons in 2017 over West Africa, Central Africa, East Africa, and Southern Africa. North Africa is not shown due to data availability. Seasonal mean profiles with the variation of the data in the pressure layer (25% quantile to 75% quantile) in MAM (March, April, and May), JJA (June, July, and August), SON (September, October, and November), and DJF (December, January, and February) are shown.

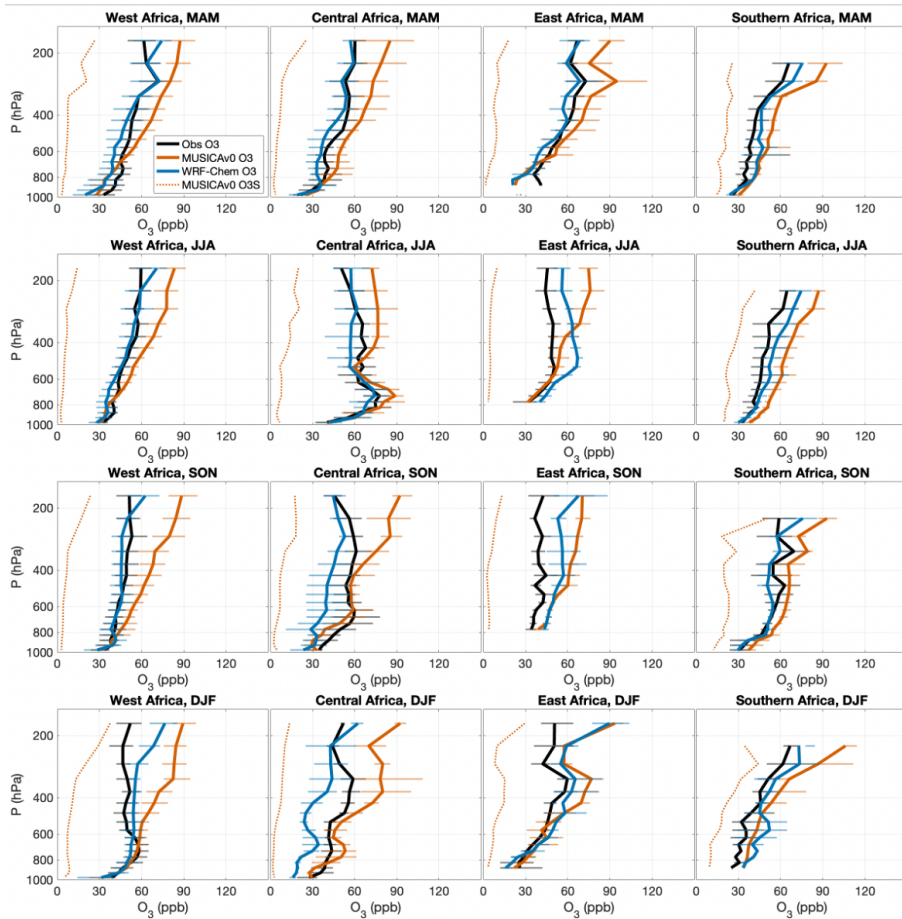

1045  
 1046 **Figure 7.** Vertical profiles of O<sub>3</sub> (ppb) from the In-service Aircraft for a Global Observing System  
 1047 (IAGOS) measurements (black) and corresponding model output from MUSICAv0 (red), and  
 1048 WRF-Chem (blue) during different seasons in 2017 over West Africa, Central Africa, East Africa,  
 1049 and Southern Africa. North Africa is not shown due to data availability Seasonal mean profiles  
 1050 with the variation of the data in the pressure layer (25% quantile to 75% quantile) in MAM (March,  
 1051 April, and May), JJA (June, July, and August), SON (September, October, and November), and  
 1052 DJF (December, January, and February) are shown. The dash red lines represent O3S  
 1053 (stratospheric ozone tracer) from the MUSICAv0 simulation.

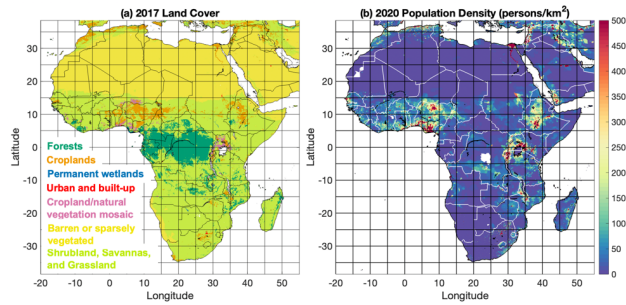

1054 **Figure 8.** (a) Land cover in 2017 and (b) population density (persons/km<sup>2</sup>) in 2020 over Africa.  
 1055 Land cover data is from MODIS/Terra+Aqua Land Cover Type Yearly L3 Global product  
 1056 (resolution: 0.05 degree) (Friedl et al., 2022). Cropland/Natural Vegetation Mosaics means  
 1057 Mosaics of small-scale cultivation (40-60%) with natural tree, shrub, or herbaceous vegetation.  
 1058 Population density data is from the Gridded Population of the World, Version 4 (GPWv4),  
 1059 Revision 11 (CIESIN, 2018).  
 1060  
 1061  
 1062

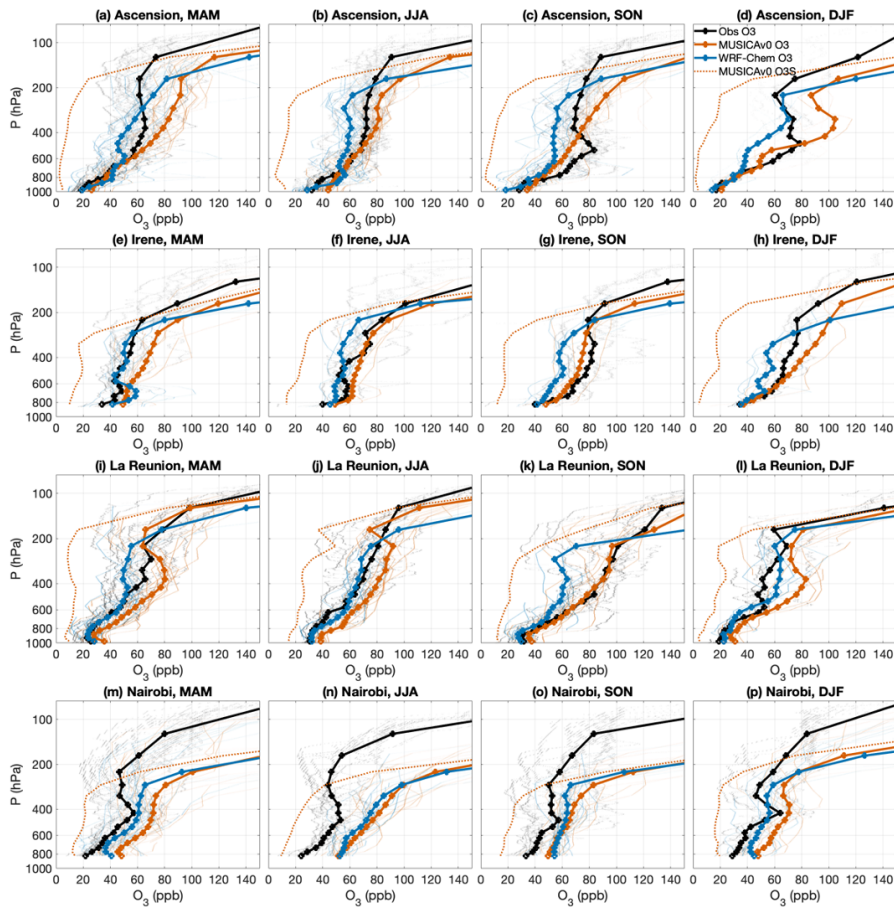

1063  
 1064 **Figure 9.** Vertical profiles of O<sub>3</sub> (ppb) from Ozonesondes (black) and corresponding model output  
 1065 from MUSICAv0 (red), and WRF-Chem (blue) for each season of 2017. The thick lines denote  
 1066 the seasonal mean profiles and the thin lines denote the individual profiles. The dash red lines  
 1067 represent O3S (stratospheric ozone tracer) from the MUSICAv0 simulation. Ozonesonde data at  
 1068 Ascension in (a) MAM (March, April, and May), (b) JJA (June, July, and August), (c) SON  
 1069 (September, October, and November), and (d) DJF (December, January, and February) are shown.  
 1070 (e-h), (i-l), and (m-p) are the same as (a-d), except for Irene, La Reunion, and Nairobi, respectively.  
 1071 Locations of the sites are shown in Figure 1b.  
 1072

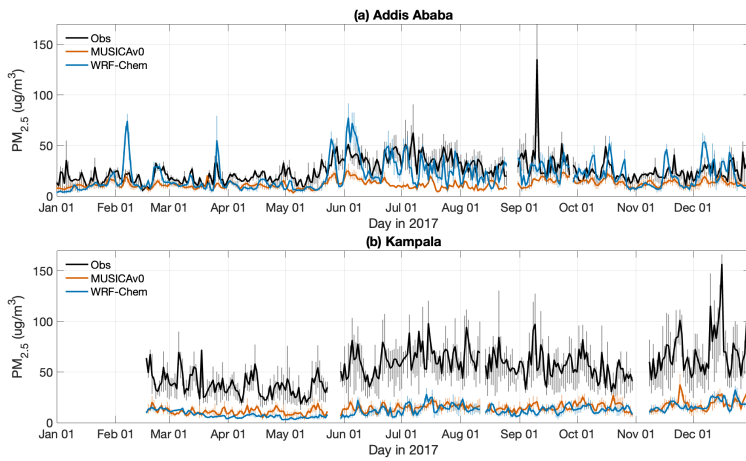

1073  
 1074  
 1075  
 1076  
 1077  
 1078  
 1079

**Figure 10.** Daily mean  $PM_{2.5}$  from in situ observations (black), MUSICAv0 (red), and WRF-Chem (blue) during 2017 at (a) Addis Ababa and (b) Kampala. Daily means are calculated from 3-hourly data. The shown range for each data point shows the variation on that day (25% quantile to 75% quantile). Locations of the sites are shown in Figure 1b.

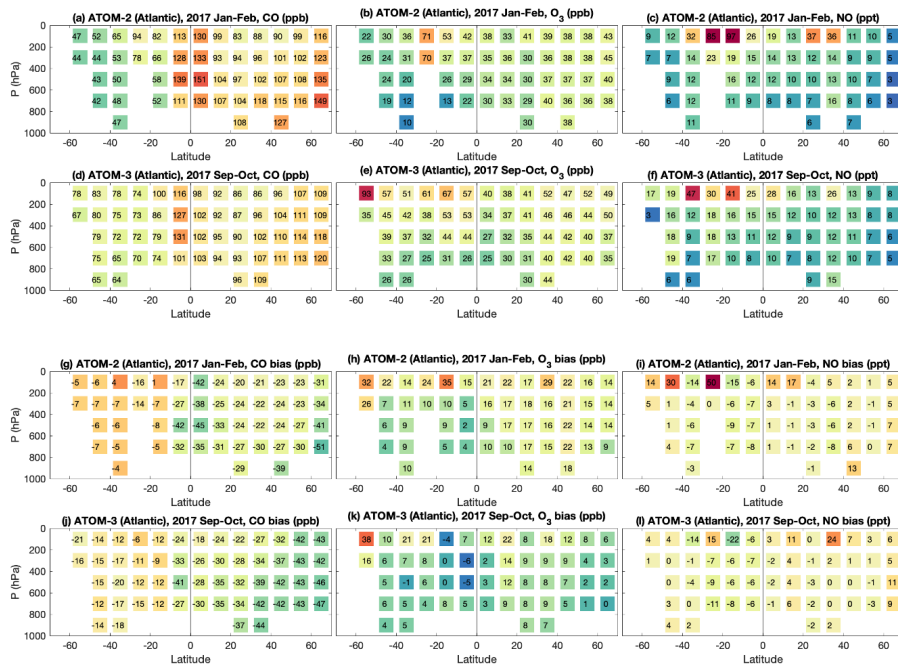

1080  
 1081 **Figure 11.** Observations of (a) CO (ppb), (b) O<sub>3</sub> (ppb), and (c) NO (ppt) over Atlantic Ocean  
 1082 during ATom-2 and ATom-3 (d-f). (g-i) corresponding model biases against ATOM observations.  
 1083 The ATom airborne measurements and corresponding MUSICA v0 model results are binned to 10-  
 1084 degree latitude and 200-hPa pressure bins. The values of mean biases for each latitude and pressure  
 1085 bin are labeled in the figure.  
 1086



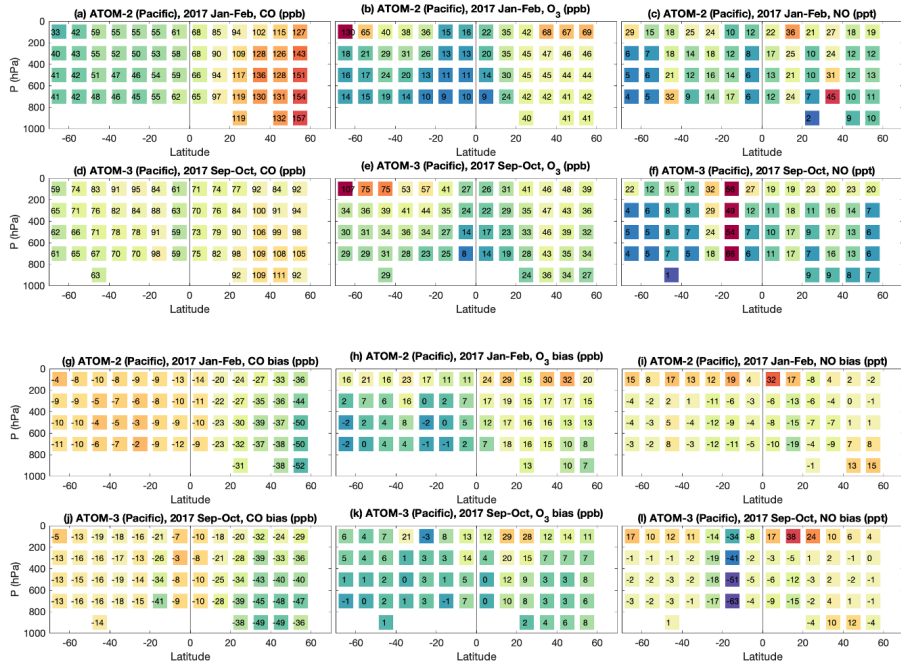

1087  
1088  
1089  
1090  
1091  
1092

Figure 12. Same as Figure 9 but for over the Pacific Ocean.

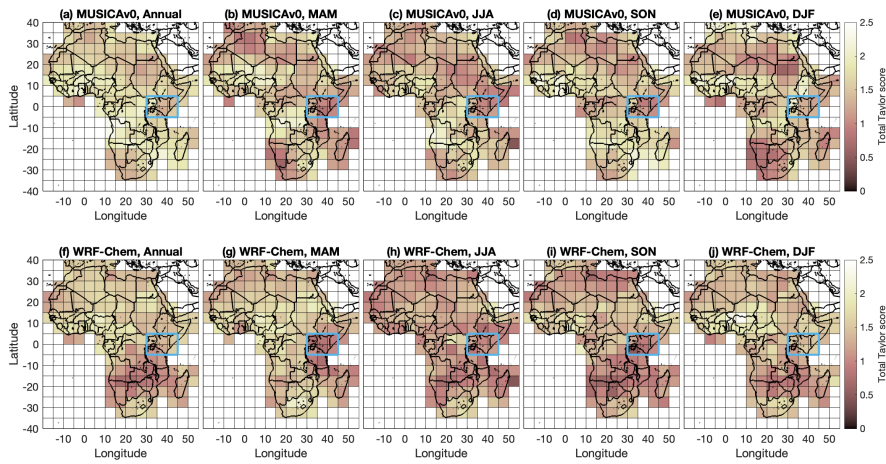

1093  
 1094  
 1095  
 1096  
 1097  
 1098  
 1099  
 1100  
 1101  
 1102  
 1103  
 1104  
 1105  
 1106

**Figure 13.** Spatial distribution of total Taylor score of MUSICAv0 and (f-j) WRF-Chem compared to satellite retrievals. In each  $5^\circ \times 5^\circ$  (latitude  $\times$  longitude) pixel, Taylor scores of the model compared to three satellite products (e.g., MOPITT CO column retrievals, OMI tropospheric NO<sub>2</sub> column retrievals, and MODIS AOD) are calculated separately (as shown in Figure S8). Taylor score against each satellite product ranges from 0 to 1. And then three Taylor scores are summed up to obtain the shown total Taylor score (ranges from 0 to 3). Total Taylor score of MUSICAv0 for (a) 2017, (b) MAM (March, April, and May), (c) JJA (June, July, and August), (d) SON (September, October, and November), and (e) DJF (December, January, and February) are shown. The blue box highlights a potential region for future field campaigns and/or in situ observations. (f-j) are similar to (a-e) except for WRF-Chem.

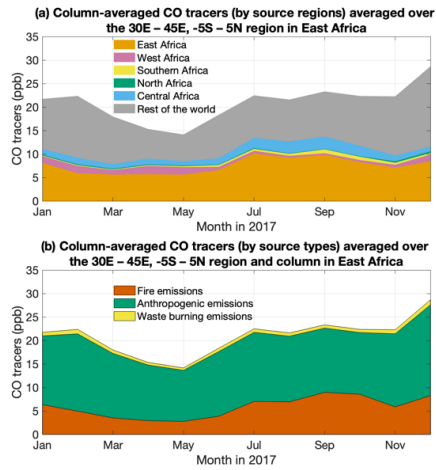

1107  
 1108 **Figure 14.** Monthly time series of column-averaged CO tracers in the 30°E – 45°E, -5°S – 5°N  
 1109 region in East Africa. (a) CO tracers of emissions from North Africa (green), West Africa (pink),  
 1110 East Africa (orange), Central Africa (blue), Southern Africa (yellow), and the rest of the world  
 1111 (grey). (b) CO tracers of fire emissions (red), anthropogenic emissions (green), and waste burning  
 1112 emissions (yellow).

1113
